1  
2  
3  
4  
5  
6  
7  
8  
9  
10  
11  
12  
13  
14  
15  
16  
17  
18  
19  
20  
21  
22  
23  
24  
25  
26

# Lineage-dependent differences and the role of IFITM3 in the type-I interferon-induced restriction of Zika virus

Short title: Type-I interferon-induced restriction of diverse Zika virus strains

Theodore Gobillot<sup>1,2,¶</sup>, Daryl Humes<sup>1,¶</sup>, Amit Sharma<sup>1,#</sup>, and Julie Overbaugh<sup>1\*</sup>

<sup>1</sup> Division of Human Biology, Fred Hutchinson Cancer Research Center, Seattle, Washington, United States of America

<sup>2</sup> Medical Scientist Training Program, University of Washington School of Medicine, Seattle, Washington, United States of America

<sup>#</sup> Current address: Departments of Veterinary Biosciences and Microbial Infection and Immunity, The Ohio State University, Columbus, Ohio, United States of America

\* Corresponding author

E-mail: [joverbau@fredhutch.org](mailto:joverbau@fredhutch.org) (JO)

¶ These authors contributed equally to this work.

## 27 **Abstract**

28 Type-I interferon (IFN-I) is an important aspect of host innate antiviral response. Recent studies  
29 have shown that IFN-I can inhibit Zika virus (ZIKV) replication and that this is mediated in part  
30 by Interferon-induced transmembrane protein 3 (IFITM3). ZIKV infections in South America  
31 have led to severe congenital syndrome in a subset of infected infants. ZIKV was first identified  
32 in Africa, where there is limited evidence for the pathogenic effects associated with the  
33 American outbreak, which is fueled by infection with Asian-lineage strains, raising the  
34 possibility that the African and Asian ZIKV lineages have distinct pathogenic properties. Given  
35 the observation that IFN-I can inhibit ZIKV replication in cell culture, we asked whether ZIKV  
36 strains differed in their susceptibility to IFN-I. There was a range of susceptibilities to IFN-I  
37 inhibition across virus strains. Virus production in A549 cells was reduced from 3-42-fold for  
38 IFN $\alpha$  and 63-807-fold for IFN $\beta$  across a panel of nine viruses, five from the African-lineage and  
39 four from the Asian-lineage. African-lineage ZIKV strains were more resistant to IFN-I than  
40 Asian-lineage strains, but this difference was only significant for IFN $\alpha$ -mediated restriction ( $p =$   
41 0.049). Notably, over-expression of IFITM3 at similar levels induced by IFN-I did not  
42 significantly restrict either a prototype African lineage (MR 766) or Asian lineage (PRVABC59)  
43 isolate. Moreover, knocking out IFITM3 expression did not result in a significant increase in  
44 viral replication or a diminishment of the inhibition by IFN-I. Overall, our findings show that  
45 while diverse ZIKV strains are susceptible to the antiviral effects of IFN-I, African-lineage  
46 strains are more resistant to IFN $\alpha$ . In addition, the majority of the IFN-I-induced inhibition of  
47 ZIKV strains cannot be explained by IFITM3, suggesting that other unknown ISGs may be the  
48 driving force of the type I IFN response against ZIKV.

## 49 **Author summary**

50 The innate immune system, and specifically the type-I interferon response, is a critical  
51 component of the host response against viral infections. The recent unprecedented spread and  
52 severe pathogenic features of Zika virus in the Americas have led to significant interest in  
53 characterizing features of Zika virus strains that have fueled the American outbreak. Zika virus  
54 was first identified in Africa, where there is limited evidence for the pathogenic effects  
55 associated with the American outbreak. Here, we demonstrate that African-lineage Zika virus  
56 strains are significantly more resistant to the effects of type-I interferon, and that type-I  
57 interferon-mediated restriction of Zika virus strains is not explained by the host factor Interferon-  
58 induced transmembrane protein 3. This improved understanding of Zika virus-host interactions  
59 may explain certain pathogenic features of Asian-lineage Zika virus strains that have fueled the  
60 American Zika virus epidemic, and supports the search for as-yet-unidentified actors in the  
61 interferon response against Zika virus.

## 62 **Introduction**

63           The recent spread and severe pathogenic features of Zika virus (ZIKV) in the Americas  
64 have highlighted the epidemic potential of this emerging pathogen. ZIKV was detected in Brazil  
65 in May 2015 [1]. By December 2015, ZIKV had infected an estimated 1.3 million individuals in  
66 the region [2]. During this time, an American outbreak clade of ZIKV strains clustered within the  
67 Asian-lineage was linked to fetal abnormalities, a severe congenital syndrome in neonates, and  
68 adverse neurological outcomes in adults [3-6]. Prior to the American epidemic, only two  
69 outbreaks of ZIKV had been reported. In 2007, ZIKV first emerged in the Pacific on Yap Island  
70 and infected ~75% of the island's population [7]. From 2013 to 2014, an outbreak of ~30,000  
71 symptomatic ZIKV infections was reported in French Polynesia, which then rapidly spread to  
72 other Pacific Islands [8, 9].

73           ZIKV was first identified in Africa over 70 years ago and only sporadic infections were  
74 reported from tropical Africa and Asia prior to its emergence in the Pacific. There is limited  
75 evidence that African-lineage ZIKV infections are associated with the severe pathogenic profile  
76 that has been described in recent ZIKV outbreaks fueled by Asian-lineage strains. This raises the  
77 possibility that African- and Asian-lineage ZIKV strains may have distinct pathogenic properties.  
78 Interestingly, a number of studies have suggested that African lineage strains tend to have  
79 increased replication kinetics, cytopathicity and more severe pathogenic outcomes in small  
80 animal models as compared to Asian-lineage strains [10-22]. This increased replication fitness  
81 of African lineage viruses is somewhat surprising given the relative absence of disease  
82 associated with this viral clade, raising additional questions about mechanisms of ZIKV  
83 pathogenesis.

84           Type-I interferon (IFN-I) is a critical component of the host innate immune response to  
85 viral infection [23]. Upon recognition of viral infection, target cells enter a transcriptional  
86 program that increases the production of IFN-I (IFN $\alpha$  and IFN $\beta$ ), which establishes an anti-viral  
87 state in bystander cells and restricts viral replication in infected target cells [24]. The ability of  
88 IFN-I to restrict viral replication is largely due to the activation of thousands of interferon-  
89 stimulated genes (ISGs) that have a wide range of anti-viral functions [25]. IFN-I is capable of  
90 restricting ZIKV in cell culture [26, 27], and most murine models of ZIKV infection and  
91 pathogenesis require ablation of the IFN-I signaling pathway, underscoring the important role of  
92 ISGs in restricting ZIKV replication [19]. One such ISG is the Interferon-Induced  
93 Transmembrane Protein 3 (IFITM3), which was the first ISG described as a key effector of the  
94 IFN-I response against ZIKV [28, 29]. IFITM3 is a small transmembrane protein that restricts a  
95 broad array of viruses and is potently induced by IFN-I [30]. It is unclear whether strains of  
96 ZIKV differ in their susceptibility to IFN-I-mediated restriction.

97           The goals of this study were to determine whether Zika viruses differ their susceptibility  
98 to restriction by IFN-I and whether there are overall differences between African and Asian  
99 lineage viruses. We demonstrate that African-lineage viruses are significantly more resistant to  
100 the effects of IFN $\alpha$  than Asian-lineage viruses; they also show greater resistance to IFN $\beta$ , but the  
101 difference is not significant as strains from both lineages are potently restricted by IFN $\beta$ . We also  
102 find that IFITM3 does not explain the IFN-I-mediated restriction of the nine ZIKV strains tested.  
103 These findings support the continued identification and characterization of additional IFN-I-  
104 induced factors that restrict ZIKV.

## 105 Results

### 106 Effect of IFN-I treatment on diverse ZIKV strains in A549 cells

107 In order to test the hypothesis that IFN-I sensitivity differs between African-lineage and  
 108 Asian-lineage ZIKV strains, a panel of nine viruses was tested for their ability to replicate in  
 109 A549 cells in the presence or absence of IFN-I. Five strains (MR 766, IbH 30656, DAK-AR-25,  
 110 DAK-AR-67, DAK-AR-71) belong to the African lineage and four strains (FLR, PRVABC59,  
 111 H/PAN/2016/BEI, H/PAN/2015/CDC) belong to the American outbreak clade within the Asian  
 112 lineage (Fig 1, blue asterisks). The percent identity of the complete genomes of African vs. Asian  
 113 lineage strains in this panel is 88-89%, which is representative of the overall diversity of isolated  
 114 ZIKV strains [8]. All Asian-lineage viruses were isolated from infected humans, while only one  
 115 African-lineage virus was isolated from an infected human (IbH 30656). Three African-lineage  
 116 strains were isolated from mosquitoes (DAK-AR-25, DAK-AR-67, DAK-AR-71) and one from  
 117 a sentinel rhesus macaque (MR 766) (Table 1). In addition, these strains have diverse passage  
 118 histories. Most have undergone 3-5 passages in mosquito (AP61, C6/36) and/or African-green  
 119 monkey (Vero) cell lines; however, MR 766 has been extensively passaged in mouse brain and  
 120 subsequently in Vero cells. IbH 30656 has a similar but less extensive high-passage profile. Of  
 121 note, the number of passages in AP61 cells in DAK-AR-67 and DAK-AR-71 is unknown.

122 **Table 1. Summary of characteristics of ZIKVs used in this study.**

| <i>Strain</i> | <i>Lineage</i> | <i>Source</i>                         | <i>Passage History</i>                           |
|---------------|----------------|---------------------------------------|--------------------------------------------------|
| MR 766        | African        | Rhesus (Uganda 1947)                  | 150x mouse brain<br>8x Vero cells                |
| IbH 30656     |                | Human (Nigeria 1968)                  | 21x mouse brain<br>4x Vero cells                 |
| DAK-AR-25     |                | <i>Aedes africanus</i> (Senegal 1984) | 1x AP61 cells<br>1x C6/36 cells<br>3x Vero cells |
| DAK-AR-67     |                | <i>Aedes taylori</i> (Senegal 1984)   | ?x AP61 cells<br>1x C6/36 cells                  |

|                       |       |                                     |                                                  |
|-----------------------|-------|-------------------------------------|--------------------------------------------------|
|                       |       |                                     | 2x Vero cells                                    |
| DAK-AR-71             |       | <i>Aedes taylori</i> (Senegal 1984) | ?x AP61 cells<br>1x C6/36 cells<br>2x Vero cells |
| PRVABC59              | Asian | Human (Puerto Rico 2015)            | 5x Vero cells                                    |
| FLR                   |       | Human (Columbia 2015)               | 3x C6/36 cells                                   |
| H/PAN/2016/BEI-259634 |       | Human (Panama 2016)                 | 4x Vero cells                                    |
| H/PAN/2015/CDC/259359 |       | Human (Panama 2015)                 | 4x Vero cells                                    |

123

124 For each strain in the panel, two independent stocks were amplified on Vero cells to  
 125 account for stock to stock variation, and the sensitivity of the viral stocks to pretreatment with  
 126 IFN $\alpha$ -2a or IFN $\beta$  (1000 U/mL) in A549 cells was determined (Fig 2; S1 Table). Both African-  
 127 lineage and Asian-lineage viruses were more potently inhibited by IFN $\beta$  pre-treatment than  
 128 IFN $\alpha$ , with viral replication as measured by viral titers reduced 3 to 42-fold in response to IFN $\alpha$   
 129 and 63 to 807-fold in response to IFN $\beta$  (Fig 2A). The biggest differences were between DAK-  
 130 AR-67 (African-lineage) and FLR (Asian-lineage) (14-fold) for IFN $\alpha$  and DAK-AR-25 and MR  
 131 766 (both African-lineage, 13-fold) for IFN $\beta$ . There was a range of responses within each  
 132 lineage: for example, among African-lineage strains, the most sensitive MR 766 isolate was  
 133 more susceptible to both IFN $\alpha$  and IFN $\beta$  than another African lineage virus, IbH 30656 (3 and  
 134 12-fold respectively; Fig 2B). Similarly, among Asian-lineage strains, FLR was the most  
 135 sensitive to IFN $\alpha$  and was 11-fold more susceptible than H/PAN/BEI-259634, while  
 136 PRVABC59 and H/PAN/CDC-259359 were both equally susceptible to IFN $\beta$  and were 7-fold  
 137 more sensitive than H/PAN/BEI-259634.

138 As an aggregate, African-lineage ZIKV strains were significantly less susceptible to  
 139 IFN $\alpha$  restriction than Asian-lineage strains (Fig 2B; p=0.049); they were also less susceptible to  
 140 IFN $\beta$ , though differences in sensitivity to IFN $\beta$  (Fig 2C; p=0.29) were not significant and were  
 141 largely driven by one virus (DAK-AR-25) with high resistance. Taken together, the data

142 reinforces IFN-I as a potent restrictor of ZIKV replication, albeit with substantial strain-to-strain  
143 differences in susceptibility, with African-lineage strains less sensitive to IFN-I than Asian-  
144 lineage strains.

145

146 **Expression of IFITM3 at levels similar to IFN-induction in A549 cells does not restrict**

147 **ZIKV**

148         Given the potent IFN-I-induced restriction of ZIKV strains in the panel, the role of the  
149 first ISG shown to restrict ZIKV was characterized. IFITM3 has been recently described as a  
150 potent IFN-I-inducible ZIKV restriction factor in HeLa, 293T, A549, HDFa, and HFF cells [28,  
151 29]. IFITM3 is induced by both IFN $\beta$  and IFN $\alpha$  in A549 cells, with slightly higher levels (~2-  
152 fold) in IFN $\beta$  than IFN $\alpha$  -treated cells at the same dose (1000U/mL). The induction was dose  
153 dependent, as shown with increasing doses of IFN $\beta$  (Fig 3A). To determine whether the  
154 induction of IFITM3 expression could explain the sensitivity of ZIKV to IFN-I, an A549 cell line  
155 expressing an N-terminally FLAG-tagged IFITM3 was generated (Fig 3B). To ensure that the  
156 levels of IFITM3 were physiologically relevant, we sorted cells and selected cells with relatively  
157 lower levels of IFITM3. IFITM3-expressing A549 cells expressed similar (~ 2-fold higher)  
158 levels of IFITM3 than in IFN $\beta$ -treated A549 control cells (Fig 3C).

159         To assess the effect of IFITM3 expression on ZIKV replication, IFITM3-expressing and  
160 control cells were infected with African-lineage isolate MR 766 and Asian-lineage isolate  
161 PRVABC59, both of which were found to be especially susceptible to IFN-I. Viral replication  
162 was not significantly different in cells expressing IFITM3 than from control cells for either strain  
163 (Fig 4A, B). Importantly, an Influenza A reporter virus was potently restricted in IFITM3-  
164 expressing cells, while virus-like particles expressing the murine leukemia virus envelope protein



165 were not restricted in these cells (Fig 4C, D). This is consistent with published data showing  
166 IFITM3 restricts Influenza A virus but not murine leukemia virus [31].

167 Notably, cells expressing IFITM3 continued to have a robust response to IFN $\beta$ , with  
168 drastic reductions in viral replication for both strains ( $1.6 \times 10^3$  –  $5.1 \times 10^3$  –fold) when compared  
169 to infection of untreated control cells (Fig 4A, B). Taken together, these data suggest that the  
170 physiological levels of IFITM3 induced by IFN $\beta$  in A549 cells are not sufficient to substantially  
171 antagonize ZIKV replication and may explain only a small part of the IFN $\beta$  effect in these cells.

172

### 173 **IFITM3 does not explain the IFN-I inhibition of ZIKV in A549 cells**

174 ZIKV was not restricted in cells exogenously expressing IFITM3 at levels that appeared  
175 by Western blot to be similar to those induced by IFN $\beta$ , suggesting that IFITM3 may not be a  
176 major contributor to the IFN $\beta$  effect against Zika virus. However, we cannot rule out that the  
177 presence of a FLAG epitope impacts IFITM3 activity. Thus, to better define the contribution of  
178 IFITM3 to the overall IFN-I response against ZIKV replication, we employed a complementary  
179 CRISPR-Cas9 gene editing approach to knock out IFITM3. A549 cells were transduced with  
180 virus-like particles (VLPs) carrying a lentiviral vector encoding Cas9 along with IFITM3-  
181 targeting sgRNAs (sgRNA1 or sgRNA2) or a non-targeting control (NTC) sgRNA. Cells  
182 transduced with sgRNA1 or sgRNA2 were depleted in IFITM3 expression as compared to NTC  
183 cells, both basally and when treated with IFN $\beta$  (Fig 5A). Tracking of Indels by Decomposition  
184 (TIDE) analysis of cells transduced with IFITM3-targeting sgRNAs indicated that ~96% of  
185 sgRNA1-transduced cells and 88% of sgRNA2-transduced cells were edited at the IFITM3 locus  
186 (S1 Fig) [32]. Due to the high level of sequence identity between IFITM2 and IFITM3, IFITM2  
187 expression was also knocked out in cells transduced with IFITM3-targeted sgRNAs (Fig S2).

188 However, IFITM2 is not thought to impart ZIKV restriction [29], thus it was reasoned that the  
189 cell lines would be suitable to shed light specifically on the contribution of IFITM3 to the IFN-I  
190 response against ZIKV.

191 To this end, IFITM3-knockout or NTC cells were infected with MR 766 or PRVABC59  
192 at an MOI of 1. While there was a significant increase in viral replication of MR 766 in sgRNA1  
193 IFITM3-knockout cells, the overall magnitude was small (~2.5-fold) and was not observed in  
194 sgRNA2 IFITM3-knockout cells infected with MR 766 (~1.4-fold). These slight increases in  
195 viral replication were also not consistently observed in IFITM3-knockout cells infected with  
196 PRVABC59. Moreover, when IFITM3-knockout cells were treated with IFN $\beta$ , there was a  
197 substantial decrease in viral replication as compared to untreated cells, with viral titers in  
198 IFITM3-knockout cells being decreased between  $5 \times 10^2$  and  $8.1 \times 10^3$ -fold (Fig 5B). Viral  
199 replication was decreased by a similar amount ( $4.4 \times 10^3$  and  $5.6 \times 10^3$ -fold) in NTC cells treated  
200 with IFN $\beta$  and was not significantly different from IFITM3-knockout cells. This suggests at best  
201 a very modest contribution of IFITM3 to the overall IFN-I response to ZIKV in A549 cells,  
202 which is consistent with the results in cells exogenously expressing IFITM3, more significantly  
203 highlighting the major contribution of ISGs other than IFITM3, at least in A549 cells (Fig 5B).

## 204 **Discussion**

205 We took advantage of a panel of African- and Asian-lineage ZIKV strains to define the  
206 IFN-I sensitivity of different ZIKV variants and determine if the host protein IFITM3 plays a  
207 critical role in the IFN-I response. ZIKV strains had a range of susceptibilities to IFN-I in A549  
208 cells but both over-expression and knockout approaches suggest that IFITM3 does not play a  
209 major role in the IFN-I-induced restriction of ZIKV. African-lineage strains as a whole were  
210 more resistant to IFN $\alpha$ -mediated restriction when compared to Asian-lineage strains. This  
211 suggests a lineage-dependent phenotypic difference that is critical at the host-virus interface and  
212 supports future studies to identify ISGs that play important roles in restricting ZIKV replication.

213 The finding that African-lineage strains in the panel were more resistant to the effects of  
214 IFN $\alpha$  as compared to Asian-lineage strains was counter-intuitive given the fact that it is Asian-  
215 lineage strains that cause severe neuropathologic outcomes in fetuses, neonates, and adults.  
216 However, the data are in line with several recent studies that have demonstrated that infection  
217 with African-lineage strains results in enhanced replication kinetics, virus production,  
218 cytopathicity, and disease progression in murine models [10-22]. Further, one of these studies  
219 has shown that induction of IFN-I is higher following infection with African-lineage strains in  
220 murine models [20]. While IFN is a potent antiviral protein, it also plays an important role in  
221 immune activation and for this reason can have dual roles in viral infection outcomes. One  
222 hypothesis to explain these data is that decreased virulence, reduced immune activation, and  
223 IFN-I sensitivity may be conducive to establishing persistent infections within certain tissues and  
224 that rapid, self-limiting virus replication may minimize opportunities to establish infected cell  
225 sanctuaries. Indeed, others have suggested that Asian-lineage strains may be better able to  
226 establish chronic infection of neural progenitor cells, undergo more efficient vertical

227 transmission, and establish viral reservoirs in the central nervous system, lymph nodes, and  
228 gastrointestinal and genitourinary tracts [22, 33-36]. A caveat of the current study is the  
229 divergent passage histories of the strains tested. Future studies with larger numbers of low-  
230 passage strains involving important target cell types of ZIKV tropism and pathogenesis will be  
231 critical in strengthening our understanding of these relationships.

232 All ZIKV strains were potently restricted by IFN $\beta$  pre-treatment. Although IFN $\alpha$  and IFN $\beta$   
233 signal through the same heterodimeric IFN receptor (IFNAR), IFN $\beta$  has been reported to possess  
234 higher binding affinities for IFNAR and can independently bind one IFNAR chain (IFNAR1),  
235 which triggers the downstream expression of a unique set of ISGs [37, 38]. A combination of  
236 these factors likely influence the stronger potency of IFN $\beta$ -mediated viral restriction we and  
237 others have observed [39]. Of note, we tested two (IFN $\alpha$ -2a and IFN $\beta$ ) of the many subtypes of  
238 IFN-I that have been shown to have specific and distinct biological effects [38, 40-42]. It will be  
239 important to test other IFN-Is alone and in combination in future studies of IFN-I-induced  
240 restriction of ZIKV.

241 It is noteworthy that while the African-lineage strains were overall more resistant to IFN $\alpha$   
242 than the Asian-lineage strains, one commonly used African isolate, MR 766, was very sensitive  
243 to both IFN $\alpha$  (19-fold knockdown) and IFN $\beta$  (807-fold knockdown). This may reflect the  
244 extensive passage history of MR 766, which could have selected for a virus that is, as a result,  
245 not adapted to evade innate immune pressures. Of note, the differences between African-lineage  
246 and Asian-lineage groups in terms of their IFN $\alpha$  would have been even stronger if MR 766 were  
247 not included in our panel. In addition, it is interesting that two of the African-lineage isolates  
248 tested, MR 766 and DAK-AR-25, are not very divergent (Fig 1) with only 38 amino-acid  
249 differences between the two isolates throughout their entire coding sequences, yet DAK-AR-25

250 was one of the most IFN-I-resistant viruses (IFN $\alpha$ =5-fold; IFN $\beta$ =63-fold). Recently, key  
251 sequence determinants in NS1, for increased evasion of IFN-I signaling, and NS4B, for  
252 replication in immunocompetent mice, have been identified [43, 44]. However, these  
253 determinants do not account for the differences between MR766 and DAK-AR-25 observed in  
254 this study. Thus, comparative sequence analysis of the panel strains and individual stocks could  
255 be leveraged to identify key sequence determinants that predict relative sensitivity to IFN-I.

256 IFITM3 has recently been reported as an important ZIKV-restricting host factor that  
257 blocks an early stage of the ZIKV replication cycle [28, 29]. The current findings provide  
258 evidence that IFITM3 does not play a substantial role in the IFN-I-induced restriction of ZIKV,  
259 at least in A549 cells where there is potent IFN-induced inhibition of ZIKV. Two ZIKV isolates  
260 belonging to each lineage (MR 766 and PRVABC59), that were highly sensitive to IFN-I, were  
261 not significantly restricted by IFITM3 when it was expressed at physiologically-relevant levels.  
262 Two viruses previously shown to be either IFITM3-susceptible (IAV) or resistant (MLV)  
263 behaved as expected when they were used to infected IFITM3-expressing cells [31]. Pre-  
264 treatment of the IFITM3-expressing cell line with IFN $\beta$  resulted in potent restriction of ZIKV  
265 strains, underscoring the critical contribution of ISGs other than IFITM3 in the IFN-I-mediated  
266 restriction of ZIKV. ZIKV restriction also remained unchanged in IFN $\beta$ -treated cells in which  
267 endogenous IFITM3 had been knocked out, providing further support that endogenous levels of  
268 IFITM3 induced by IFN-I do not play a critical role in restricting ZIKV replication. Of note, we  
269 observed a 1.4 – 2.5-fold increase in viral replication in IFITM3-deficient cells infected with MR  
270 766, which is consistent with previous studies that reported an increase in percent of infected  
271 cells after shRNA-mediated knockdown of IFITM3 [28] or deletion of the *Ifitm3* locus in murine  
272 embryonic fibroblasts [29]. Knocking out IFITM3 expression also abrogated IFITM2 expression.

273 Thus, because there were not significant differences in viral replication between IFITM2/3-  
274 deficient cells and control cells, the data is consistent with others who have found that IFITM2  
275 does not play an important role in the IFN-I-induced restriction of ZIKV [28].

276 There are several reasons that may explain why the current findings differ from previous  
277 studies that have described an important role for IFITM3 in restricting ZIKV. First, we utilized  
278 different methods for quantifying ZIKV replication. We measured viral titers by TCID<sub>50</sub> assay in  
279 cell supernatants, while previous reports have used ZIKV envelope glycoprotein or double-  
280 stranded DNA immunofluorescence. These assays capture different aspects of ZIKV replication  
281 and could explain some of our divergent findings although based on the proposed mechanism of  
282 action of IFITM3 early in the life cycle, this would not be expected to be a major factor.

283 Importantly, we used an MOI of 1 and measured viral replication at 48 hpi, which is consistent  
284 with most experiments performed in these previous studies. However, prior studies have used  
285 HeLa and MEF cells for some experiments to describe IFITM3-mediated restriction of ZIKV.  
286 Others have found that IFITM3-mediated restriction can depend on cell type, raising the  
287 interesting possibility that IFITM3 restricts ZIKV infection in some cells but not others [30]. A  
288 potentially critical difference that may explain the differences in results is the fact that several of  
289 these studies have utilized systems that, in many cases, highly overexpress IFITM3 to levels  
290 much higher than seen upon IFN-I induction [28, 29]. Thus, it is quite possible that IFITM3 can  
291 restrict infection when present at very high levels, although this may not recapitulate the  
292 response to IFN-I, where IFITM3 is not expressed at such high levels. It is also worth noting that  
293 ours is the first study to examine IFITM3-mediated restriction of ZIKV using a complete Cas9-  
294 mediated knockout as opposed to a shRNA/siRNA-mediated knockdown approach, including a  
295 knock-down that targeted the overexpressed IFITM3 gene in the same cell line [28, 29].

296 Overall, the results of this study demonstrate that the effects of IFN $\alpha$  on ZIKV replication  
297 in A549 cells are lineage-dependent in our panel of ZIKV strains. The inter-strain variation in  
298 IFN-I sensitivity across all viruses in the panel is intriguing and future studies using these strains  
299 may identify determinants of IFN-I sensitivity and/or resistance. Finally, the findings indicate  
300 that IFITM3 does not play a significant role in the IFN-I-induced restriction of ZIKV replication  
301 and thus support continued investigation of ISGs that do restrict ZIKV. Recent studies using  
302 targeted approaches against known restriction factors have reported the ability of two IFN-I-  
303 inducible host anti-viral proteins to restrict ZIKV [45-47]. In addition to targeted screens focused  
304 on known anti-viral host proteins, large-scale loss or gain-of-function genetic screens will help to  
305 identify these as-yet unknown innate immune factors.

## 306 **Materials and methods**

### 307 **Viruses**

308 Zika virus strains were kindly provided by BEI Resources (MR 766, IbH 30656, PRVABC59,  
309 FLR, H/PAN/2016/BEI-259634, H/PAN/2015/CDC-259359) and Michael Diamond (DAK-AR-  
310 25, DAK-AR-67, DAK-AR-71). All strains were tested for mycoplasma using the Universal  
311 Mycoplasma Detection Kit (ATCC) by inoculating 1e6 HEK293T cells with 100 uL of viral  
312 aliquot and harvesting cells and cell debris 5 days post-inoculation according to the  
313 manufacturer's protocol. Any stocks found to have mycoplasma contamination were filtered  
314 through a 0.2 um filter and re-tested and confirmed to be mycoplasma-free before proceeding  
315 with virus propagation. All Zika virus strains were propagated by inoculating Vero cells at an  
316 MOI of 0.01 in a minimal volume of serum-free DMEM for 4-6 hours. After inoculation, fresh  
317 DMEM supplemented with 2mM L-glutamine, 1X Anti-anti (anti-microbial/anti-mycotic, Gibco)  
318 and 3.3% FBS was added to the inoculum so that the final concentration of FBS was 2%.  
319 Supernatants were collected 4 days post-inoculation, except in the case of the FLR isolate, which  
320 gave higher titers when supernatants were collected 5 days post-inoculation. Supernatants were  
321 cleared of cellular debris by centrifuging for 10 minutes 300g at 4°C, before aliquoting and  
322 storage at -80°C and viral titers were determined by the TCID<sub>50</sub> assay described below.  
323 Experiments were performed with aliquots that had undergone at most two freeze-thaw cycles,  
324 which was not found to have any discernible effect on viral titers.

325

### 326 **Cells**

327 A549 cells (A. Berger; ATCC) were maintained in RPMI (Invitrogen) supplemented with 10%  
328 fetal bovine serum (FBS), 2mM L-glutamine, and 1X Anti-anti (anti-microbial/anti-mycotic,



329 Gibco). Vero cells (A. Geballe; ATCC) and HEK293T cells were maintained in DMEM  
330 (Invitrogen) supplemented with 10% FBS, 2mM L-glutamine, and 1X Anti-anti. The identity of  
331 the A549 cells and HEK293T cells was confirmed using STR CODIS finger-printing and all cell  
332 lines were found to be mycoplasma-free by the Research Cell Bank shared resource at the Fred  
333 Hutchinson Cancer Research Center.

334

### 335 **Sequencing and phylogenetic analysis of ZIKV strains**

336 All Zika virus stocks were sequence-confirmed by Sanger sequencing of a 1.8 – 3.4-kbp region  
337 of the Zika virus genome that encodes non-structural proteins 1 through 3. The complete open  
338 reading frame of DAK-AR-67 was sequenced, since there was no sequence data available for  
339 this isolate. To do this, viral RNA was isolated using the QiaAMP Viral RNA Mini Kit (Qiagen)  
340 and cDNA was produced using SuperScript III First Strand Synthesis System (Invitrogen) with  
341 random hexamers according to the manufacturer's suggested protocol. The Primal Scheme  
342 primer designer software (<http://primal.zibraproject.org/>) was then used to design primers that  
343 tiled across the complete open reading frame in ~645 bp fragments that overlapped by ~210 bp  
344 (Table S2) [48]. Five overlapping amplicons were generated by PCR amplification of cDNA  
345 with Q5 ReadyMix (NEB) using a subset of primer pairs (Table S3). Thermocycling conditions  
346 used were:

347 98°C, 30 s

348 98°C, 15 s, 30x

349 65°C, 5 min.

350 Each of the amplicons was then subjected to Sanger sequencing using the primers indicated in  
351 Table S2. Full-length open-reading-frame nucleotide sequences of ZIKV strains in the panel, as

352 well as other ZIKV strains, were used to construct a maximum-likelihood phylogenetic tree with  
353 PhyML using a general time-reversible nucleotide substitution model [49].

354

### 355 **IFN-I sensitivity assay**

356 For each ZIKV strain,  $8 \times 10^4$  A549 cells were plated in each of three wells of a 24-well plate in a  
357 final volume of 1 mL of complete RPMI. One well was left untreated and the other two wells  
358 were pretreated with 1000 U/mL of IFN $\alpha$ -2a or IFN $\beta$  for 24 hours. After pre-treatment, cells  
359 were infected at an MOI of 1 in a final volume of 250  $\mu$ L of serum-free RPMI for 4-6 hours. The  
360 inoculum was then aspirated, cells were washed twice with 1X PBS, and replenished with 1 mL  
361 of complete RPMI without IFN-I or containing 1000 U/mL of IFN $\alpha$ -2a or IFN $\beta$ . At 48 hours  
362 post-infection (hpi), 250  $\mu$ L of supernatants were harvested and cleared of cellular debris at 4°C  
363 at 300G for 10 minutes and 2 X 100  $\mu$ L aliquots were stored at -80°C until titration by TCID<sub>50</sub>  
364 assay. All infections were performed with two separately-generated stocks of each ZIKV strain  
365 with biological duplicates for each stock. For the data analysis, all values were plotted and  
366 statistical analyses performed using Prism version 7 (GraphPad Software). TCID<sub>50</sub>/mL and  
367 Percent Relative Infection were calculated. Percent Relative Infection was determined by  
368 dividing the titer in the IFN $\alpha$ - or IFN $\beta$ -treated sample by the untreated sample.

369

### 370 **TCID<sub>50</sub> assays**

371 Zika viral titers were determined by TCID<sub>50</sub> assay on Vero cells in a 96-well format. One day  
372 prior to titration, Vero cells were seeded in 100  $\mu$ L of complete DMEM in a flat-bottomed 96-  
373 well plate at  $8 \times 10^3$  cells per well. For each condition tested, seven serial 10-fold dilutions of  
374 viral supernatants were prepared, starting at a concentration of 1  $\mu$ L/well, with each dilution

375 including 10 replicate wells and 2 mock infected wells. Cells were infected with 50 uL of each  
376 viral dilution in serum free DMEM for 4-6 hours, before being replenished with 100 uL of  
377 DMEM with 3% FBS, for a final concentration of 2% FBS. On day 5 post-infection the wells at  
378 a given dilution were scored by light microscope for the presence or absence of cytotoxicity and  
379 the TCID<sub>50</sub>/mL was calculated using the Spearman-Karber method.

380

### 381 **Generation of stable cell lines overexpressing IFITM3**

382 IFITM3-expressing A549 cells were generated as previously described [50]. Briefly, the  
383 N-terminal FLAG-tagged IFITM3 open-reading frame was cloned into pHIV-ZsGreen directly  
384 upstream of the IRES-driven ZsGreen fluorescent reporter. Virus-like particles (VLPs) were  
385 generated in HEK293T cells by co-transfecting cells with pHIV-ZsGreen constructs (either  
386 IFITM3-encoding or empty vector as control) [51], psPAX2 (HIV-based packaging plasmid)  
387 [52], and pMD.G (vesicular stomatitis virus glycoprotein [VSV-G] envelope plasmid) [53] at a  
388 ratio of 1:1:0.5 using FuGENE 6 (Promega) according to the manufacturer's protocol.  
389 Supernatants from HEK293T cells were collected 48 hours post-transfection and concentrated  
390 ~100-fold using Amicon Ultracel 100 K filters (Millipore). VLPs were then used to transduce  
391 A549 cells that has been plated 24 hours prior in a 6-well plate at 1x10<sup>5</sup> cells/well in 2 mL of  
392 RPMI supplemented with 10% FBS and 2mM glutamine. A549 cells were transduced by  
393 spinoculation at 1200 x g for 90 minutes. The following day, the cells were expanded into new  
394 T75 flasks and were subsequently passaged and maintained in complete DMEM. IFITM3-  
395 expressing cells were sorted by gating cells in the fiftieth-percentile of zsGreen expression on a  
396 FACSAria II cell sorter.

397

## 398 **Generation of IFITM3 knockout cells lines**

399 For generation of IFITM3-knockout A549 cell lines, guide RNAs targeting the first exon  
400 of *Ifitm3*, or non-targeting control guide RNA, were cloned into pLentiCRISPR, which allows  
401 for the expression of the guide RNA and Cas9 from the same construct. VLPs were generated as  
402 described above by co-transfecting the pLentiCRISPR plasmids, the psPAX2 packaging vector,  
403 and pMD2.G (vesicular stomatitis virus glycoprotein [VSV-G] envelope plasmid) at a ratio of  
404 1:1:0.5 using the FuGENE 6 transfection reagent (Promega) according to the manufacturer's  
405 protocol. The following day, cells were expanded into new T75 flasks and cultured.  
406 Subsequently, cells were passaged and cultured in complete media supplemented with 2 µg/ml of  
407 puromycin to select for sgRNA and Cas9 expression. The two sgRNAs that yielded the most  
408 efficient knockout of IFITM3 were sgRNA1, 5'-GCAGCAGGGGTTTCATGAAGA-3';  
409 and sgRNA2, 5'-TTGAGCATCTCATAGTTGGG-3' and the non-targeting control was 5'-  
410 ATCTCGGGTCGACTGCGGAT-3'. Gene knockout was characterized by Tracking of Indels by  
411 Decomposition (TIDE) analysis. Briefly, after three rounds of puromycin selection, genomic  
412 DNA was isolated using the QuickExtract DNA extraction solution (Lucigen) by resuspending  
413 cells in 100 µL of the solution, and by denaturing for 20 min at 60 °C and 20 min at 95 °C. The  
414 *ifitm3* locus was amplified using the following primer set: forward  
415 ACCATCCCAGTAACCCGACCG and reverse GCTGATACAGGACTCGGCTCC. Amplicons  
416 were Sanger sequenced and gene editing was measured using TIDE analysis ([https://tide-](https://tide-calculator.nki.nl/)  
417 [calculator.nki.nl/](https://tide-calculator.nki.nl/)).

418

## 419 **Western blots and quantification**

420 Whole cell extracts were prepared by lysing the cells in RIPA cell lysis buffer (50 mM Tris pH  
421 8.0, 0.1% SDS, 1% Triton-X, 150 mM NaCl, 1% deoxycholic acid, 2 mM PMSF). Standard  
422 Western blotting procedures were used with the following antibodies: IFITM3 (Proteintech  
423 11714-1-AP, used at 1:1000 dilution), IFITM2 (Proteintech 66137-1-Ig, used at 1:500 dilution),  
424 FLAG (OriGene TA100023, used at 1:2000 to 1:5000 dilution), and GAPDH (BioRad  
425 MCA4739P, used at 1:5000 dilution). Protein expression was quantified by measuring the band  
426 intensities using LI-COR Image Studio Software.

427

#### 428 **Influenza A virus and Murine Leukemia Virus VLP infections**

429 Influenza A virus/WSN (IAV; generously provided by A. Russell and J. Bloom) is an mCherry-  
430 expressing reporter virus where HA is replaced with mCherry. For murine leukemia virus  
431 (MLV), reporter VLPs were made by packaging the lentiGuide.mCherry vector [54] (a gift from  
432 Richard Young, AddGene plasmid #104375) with psPAX2 and pseudotyping with an  
433 amphotropic MLV envelope. For both viruses,  $8 \times 10^4$  IFITM3-expressing and control cells were  
434 plated in a 24-well plate one day prior to infections in a final volume of 1 mL of complete RPMI.  
435 For IAV, cells were infected at an MOI of 10 in 500  $\mu$ L of complete RPMI for 16 hours. Cells  
436 were harvested and fixed in 1% paraformaldehyde. For MLV, cells were infected with a dilution  
437 of VLPs in complete RPMI supplemented with 10  $\mu$ g/mL DEAE dextran. Cells were harvested  
438 and fixed in 1% paraformaldehyde 72 hours post infection. Both IAV and MLV-infected cells  
439 were assessed for mCherry expression using a Fortessa X50 flow cytometer and data was  
440 analyzed using FlowJo v9 software.

## 441 **Acknowledgments**

442 We thank Michael Diamond for providing DAK-AR-25, DAR-AR-67, and DAK-AR-71 Zika  
443 virus strains; Alice Berger for providing the A549 cell line; Adam Geballe for providing Vero  
444 cells; Alistair Russell and Jesse Bloom for providing the Influenza/WSN-mCherry reporter virus;  
445 Adam Geballe, Nicholas Chesarino, and Michael Emerman for helpful discussions; Nicholas  
446 Chesarino for comments on the manuscript; and the NIAID's Biodefense and Emerging  
447 Infectious Disease Resource Repository (BEI Resources) for providing MR 766 (WRCEVA),  
448 IbH 30656 (WRCEVA), PRVABC59 (BJ Russell), FLR (R Rico-Hesse), H/PAN/2016/BEI-  
449 259634 (BEI Resources), and H/PAN/2015/CDC-259359 (AM Powers).

## 450 **References**

- 451 1. Faria NR, Quick J, Claro IM, Theze J, de Jesus JG, Giovanetti M, et al. Establishment and  
452 cryptic transmission of Zika virus in Brazil and the Americas. *Nature*. 2017;546(7658):406-  
453 10.
- 454 2. Hennessey M, Fischer M, Staples JE. Zika Virus Spreads to New Areas - Region of the  
455 Americas, May 2015-January 2016. *MMWR Morb Mortal Wkly Rep*. 2016;65(3):55-8.
- 456 3. Schuler-Faccini L, Ribeiro EM, Feitosa IM, Horovitz DD, Cavalcanti DP, Pessoa A, et al.  
457 Possible Association Between Zika Virus Infection and Microcephaly - Brazil, 2015.  
458 *MMWR Morb Mortal Wkly Rep*. 2016;65(3):59-62.
- 459 4. Munoz LS, Parra B, Pardo CA, Neuroviruses Emerging in the Americas S. Neurological  
460 Implications of Zika Virus Infection in Adults. *J Infect Dis*. 2017;216(suppl\_10):S897-  
461 S905.
- 462 5. Priyamvada L, Suthar MS, Ahmed R, Wrammert J. Humoral Immune Responses Against  
463 Zika Virus Infection and the Importance of Preexisting Flavivirus Immunity. *J Infect Dis*.  
464 2017;216(suppl\_10):S906-S11.
- 465 6. Zorrilla CD, Garcia Garcia I, Garcia Fragoso L, De La Vega A. Zika Virus Infection in  
466 Pregnancy: Maternal, Fetal, and Neonatal Considerations. *J Infect Dis*.  
467 2017;216(suppl\_10):S891-S6.
- 468 7. Duffy MR, Chen TH, Hancock WT, Powers AM, Kool JL, Lanciotti RS, et al. Zika virus  
469 outbreak on Yap Island, Federated States of Micronesia. *N Engl J Med*. 2009;360(24):2536-  
470 43.
- 471 8. Musso D, Gubler DJ. Zika Virus. *Clin Microbiol Rev*. 2016;29(3):487-524.

- 472 9. Musso D, Nilles EJ, Cao-Lormeau VM. Rapid spread of emerging Zika virus in the Pacific  
473 area. *Clin Microbiol Infect.* 2014;20(10):O595-6.
- 474 10. Anfasa F, Siegers JY, van der Kroeg M, Mumtaz N, Stalin Raj V, de Vrij FMS, et al.  
475 Phenotypic Differences between Asian and African Lineage Zika Viruses in Human Neural  
476 Progenitor Cells. *mSphere.* 2017;2(4).
- 477 11. Bowen JR, Quicke KM, Maddur MS, O'Neal JT, McDonald CE, Fedorova NB, et al. Zika  
478 Virus Antagonizes Type I Interferon Responses during Infection of Human Dendritic Cells.  
479 *PLoS Pathog.* 2017;13(2):e1006164.
- 480 12. Gabriel E, Ramani A, Karow U, Gottardo M, Natarajan K, Gooi LM, et al. Recent Zika  
481 Virus Isolates Induce Premature Differentiation of Neural Progenitors in Human Brain  
482 Organoids. *Cell Stem Cell.* 2017;20(3):397-406 e5.
- 483 13. Hamel R, Ferraris P, Wichit S, Diop F, Talignani L, Pompon J, et al. African and Asian Zika  
484 virus strains differentially induce early antiviral responses in primary human astrocytes.  
485 *Infect Genet Evol.* 2017;49:134-7.
- 486 14. Liu S, DeLalio LJ, Isakson BE, Wang TT. AXL-Mediated Productive Infection of Human  
487 Endothelial Cells by Zika Virus. *Circ Res.* 2016;119(11):1183-9.
- 488 15. McGrath EL, Rossi SL, Gao J, Widen SG, Grant AC, Dunn TJ, et al. Differential Responses  
489 of Human Fetal Brain Neural Stem Cells to Zika Virus Infection. *Stem Cell Reports.*  
490 2017;8(3):715-27.
- 491 16. Simonin Y, Loustalot F, Desmetz C, Foulongne V, Constant O, Fournier-Wirth C, et al.  
492 Zika Virus Strains Potentially Display Different Infectious Profiles in Human Neural Cells.  
493 *EBioMedicine.* 2016;12:161-9.



- 494 17. Zhang F, Hammack C, Ogden SC, Cheng Y, Lee EM, Wen Z, et al. Molecular signatures  
495 associated with ZIKV exposure in human cortical neural progenitors. *Nucleic Acids Res.*  
496 2016;44(18):8610-20.
- 497 18. Dowall SD, Graham VA, Rayner E, Hunter L, Atkinson B, Pearson G, et al. Lineage-  
498 dependent differences in the disease progression of Zika virus infection in type-I interferon  
499 receptor knockout (A129) mice. *PLoS Negl Trop Dis.* 2017;11(7):e0005704.
- 500 19. Lazear HM, Govero J, Smith AM, Platt DJ, Fernandez E, Miner JJ, et al. A Mouse Model of  
501 Zika Virus Pathogenesis. *Cell Host Microbe.* 2016;19(5):720-30.
- 502 20. Tripathi S, Balasubramaniam VR, Brown JA, Mena I, Grant A, Bardina SV, et al. A novel  
503 Zika virus mouse model reveals strain specific differences in virus pathogenesis and host  
504 inflammatory immune responses. *PLoS Pathog.* 2017;13(3):e1006258.
- 505 21. Sheridan MA, Yunusov D, Balaraman V, Alexenko AP, Yabe S, Verjovski-Almeida S, et al.  
506 Vulnerability of primitive human placental trophoblast to Zika virus. *Proc Natl Acad Sci U*  
507 *S A.* 2017;114(9):E1587-E96.
- 508 22. Sheridan MA, Balaraman V, Schust DJ, Ezashi T, Roberts RM, Franz AWE. African and  
509 Asian strains of Zika virus differ in their ability to infect and lyse primitive human placental  
510 trophoblast. *PLoS One.* 2018;13(7):e0200086.
- 511 23. Ivashkiv LB, Donlin LT. Regulation of type I interferon responses. *Nat Rev Immunol.*  
512 2014;14(1):36-49.
- 513 24. McNab F, Mayer-Barber K, Sher A, Wack A, O'Garra A. Type I interferons in infectious  
514 disease. *Nat Rev Immunol.* 2015;15(2):87-103.
- 515 25. Schneider WM, Chevillotte MD, Rice CM. Interferon-stimulated genes: a complex web of  
516 host defenses. *Annu Rev Immunol.* 2014;32:513-45.

- 517 26. Frumence E, Roche M, Krejbich-Trotot P, El-Kalamouni C, Nativel B, Rondeau P, et al.  
518 The South Pacific epidemic strain of Zika virus replicates efficiently in human epithelial  
519 A549 cells leading to IFN-beta production and apoptosis induction. *Virology*.  
520 2016;493:217-26.
- 521 27. Hamel R, Dejarnac O, Wichit S, Ekchariyawat P, Neyret A, Luplertlop N, et al. Biology of  
522 Zika Virus Infection in Human Skin Cells. *J Virol*. 2015;89(17):8880-96.
- 523 28. Monel B, Compton AA, Bruel T, Amraoui S, Burlaud-Gaillard J, Roy N, et al. Zika virus  
524 induces massive cytoplasmic vacuolization and paraptosis-like death in infected cells.  
525 *EMBO J*. 2017;36(12):1653-68.
- 526 29. Savidis G, Perreira JM, Portmann JM, Meraner P, Guo Z, Green S, et al. The IFITMs Inhibit  
527 Zika Virus Replication. *Cell Rep*. 2016;15(11):2323-30.
- 528 30. Bailey CC, Zhong G, Huang IC, Farzan M. IFITM-Family Proteins: The Cell's First Line of  
529 Antiviral Defense. *Annu Rev Virol*. 2014;1:261-83.
- 530 31. Brass AL, Huang IC, Benita Y, John SP, Krishnan MN, Feeley EM, et al. The IFITM  
531 proteins mediate cellular resistance to influenza A H1N1 virus, West Nile virus, and dengue  
532 virus. *Cell*. 2009;139(7):1243-54.
- 533 32. Brinkman EK, Chen T, Amendola M, van Steensel B. Easy quantitative assessment of  
534 genome editing by sequence trace decomposition. *Nucleic Acids Res*. 2014;42(22):e168.
- 535 33. Aid M, Abbink P, Larocca RA, Boyd M, Nityanandam R, Nanayakkara O, et al. Zika Virus  
536 Persistence in the Central Nervous System and Lymph Nodes of Rhesus Monkeys. *Cell*.  
537 2017;169(4):610-20 e14.

- 538 34. Hirsch AJ, Smith JL, Haese NN, Broeckel RM, Parkins CJ, Kreklywich C, et al. Zika Virus  
539 infection of rhesus macaques leads to viral persistence in multiple tissues. *PLoS Pathog.*  
540 2017;13(3):e1006219.
- 541 35. Sarno M, Sacramento GA, Khouri R, do Rosario MS, Costa F, Archanjo G, et al. Zika Virus  
542 Infection and Stillbirths: A Case of Hydrops Fetalis, Hydranencephaly and Fetal Demise.  
543 *PLoS Negl Trop Dis.* 2016;10(2):e0004517.
- 544 36. Simonin Y, van Riel D, Van de Perre P, Rockx B, Salinas S. Differential virulence between  
545 Asian and African lineages of Zika virus. *PLoS Negl Trop Dis.* 2017;11(9):e0005821.
- 546 37. de Weerd NA, Vivian JP, Nguyen TK, Mangan NE, Gould JA, Braniff SJ, et al. Structural  
547 basis of a unique interferon-beta signaling axis mediated via the receptor IFNAR1. *Nat*  
548 *Immunol.* 2013;14(9):901-7.
- 549 38. Jaks E, Gavutis M, Uze G, Martal J, Piehler J. Differential receptor subunit affinities of type  
550 I interferons govern differential signal activation. *J Mol Biol.* 2007;366(2):525-39.
- 551 39. Iyer SS, Bibollet-Ruche F, Sherrill-Mix S, Learn GH, Plenderleith L, Smith AG, et al.  
552 Resistance to type 1 interferons is a major determinant of HIV-1 transmission fitness. *Proc*  
553 *Natl Acad Sci U S A.* 2017;114(4):E590-E9.
- 554 40. Gibbert K, Schlaak JF, Yang D, Dittmer U. IFN-alpha subtypes: distinct biological activities  
555 in anti-viral therapy. *Br J Pharmacol.* 2013;168(5):1048-58.
- 556 41. Lavoie TB, Kalie E, Crisafulli-Cabatu S, Abramovich R, DiGioia G, Moolchan K, et al.  
557 Binding and activity of all human alpha interferon subtypes. *Cytokine.* 2011;56(2):282-9.
- 558 42. Schreiber G, Piehler J. The molecular basis for functional plasticity in type I interferon  
559 signaling. *Trends Immunol.* 2015;36(3):139-49.

- 560 43. Gorman MJ, Caine EA, Zaitsev K, Begley MC, Weger-Lucarelli J, Uccellini MB, et al. An  
561 Immunocompetent Mouse Model of Zika Virus Infection. *Cell Host Microbe*.  
562 2018;23(5):672-85 e6.
- 563 44. Xia H, Luo H, Shan C, Muruato AE, Nunes BT, Medeiros DBA, et al. An evolutionary  
564 NS1 mutation enhances Zika virus evasion of host interferon induction. *Nat Commun*.  
565 2018;9(1):414.
- 566 45. Gizzi AS, Grove TL, Arnold JJ, Jose J, Jangra RK, Garforth SJ, et al. A naturally occurring  
567 antiviral ribonucleotide encoded by the human genome. *Nature*. 2018;558(7711):610-4.
- 568 46. Li L, Zhao H, Liu P, Li C, Quanquin N, Ji X, et al. PARP12 suppresses Zika virus infection  
569 through PARP-dependent degradation of NS1 and NS3 viral proteins. *Sci Signal*.  
570 2018;11(535).
- 571 47. Van der Hoek KH, Eyre NS, Shue B, Khantisitthiporn O, Glab-Ampi K, Carr JM, et al.  
572 Viperin is an important host restriction factor in control of Zika virus infection. *Sci Rep*.  
573 2017;7(1):4475.
- 574 48. Quick J, Grubaugh ND, Pullan ST, Claro IM, Smith AD, Gangavarapu K, et al. Multiplex  
575 PCR method for MinION and Illumina sequencing of Zika and other virus genomes directly  
576 from clinical samples. *Nat Protoc*. 2017;12(6):1261-76.
- 577 49. Guindon S, Dufayard JF, Lefort V, Anisimova M, Hordijk W, Gascuel O. New algorithms  
578 and methods to estimate maximum-likelihood phylogenies: assessing the performance of  
579 PhyML 3.0. *Syst Biol*. 2010;59(3):307-21.
- 580 50. Nahabedian J, Sharma A, Kaczmarek ME, Wilkerson GK, Sawyer SL, Overbaugh J. Owl  
581 monkey CCR5 reveals synergism between CD4 and CCR5 in HIV-1 entry. *Virology*.  
582 2017;512:180-6.

- 583 51. Welm BE, Dijkgraaf GJ, Bledau AS, Welm AL, Werb Z. Lentiviral transduction of  
584 mammary stem cells for analysis of gene function during development and cancer. *Cell*  
585 *Stem Cell*. 2008;2(1):90-102.
- 586 52. Bartz SR, Vodicka MA. Production of high-titer human immunodeficiency virus type 1  
587 pseudotyped with vesicular stomatitis virus glycoprotein. *Methods*. 1997;12(4):337-42.
- 588 53. Naldini L, Blomer U, Gage FH, Trono D, Verma IM. Efficient transfer, integration, and  
589 sustained long-term expression of the transgene in adult rat brains injected with a lentiviral  
590 vector. *Proc Natl Acad Sci U S A*. 1996;93(21):11382-8.
- 591 54. Weintraub AS, Li CH, Zamudio AV, Sigova AA, Hannett NM, Day DS, et al. YY1 Is a  
592 Structural Regulator of Enhancer-Promoter Loops. *Cell*. 2017;171(7):1573-88 e28.
- 593

594 **Supporting information**

595 **S1 Table. Fold reduction in viral replication of each ZIKV strain by IFN-I.** The table lists  
596 the fold-reduction in viral replication and standard deviation (SD) of each ZIKV strain by pre-  
597 treatment of IFN $\alpha$  and IFN $\beta$  (1000 U/mL) in A549 cells.

598

599 **S2 Table. Zika virus sequencing primers.** The table lists all primers used to sequence Zika  
600 virus strains included in this study.

601

602 **S3 Table. Zika virus sub-amplicon primer pairs.** The table lists the primers pairs used to  
603 generate sub-amplicons for sequencing.

604

605 **S1 Fig. Tracking of Indels by Decomposition analysis of IFITM3-knockout A549 cells.** (a, b)  
606 TIDE analysis of sgRNA1-transduced (a) and sgRNA2-transduced (b) A549 cells. Deletion or  
607 insertion of nucleotides is plotted on the x-axis and percent of sequences is plotted on the y-axis.

608

609 **S2 Fig. IFITM2 expression is knocked out in IFITM3-knockout A549 cells.** Western blot  
610 analysis of IFITM2 expression in untreated or IFN $\beta$  pretreated (1000 U/mL) A549 cells  
611 transduced with non-targeting control (NTC), sgRNA1 (sg1), or sgRNA2 (sg2). The sgRNA  
612 used to transduce each cell line is indicated above each lane.

613 **Fig 1. Phylogenetic relationships of Zika virus strains used in this study.** Maximum-  
614 likelihood phylogeny of full-length open-reading-frame nucleotide sequences using Zika virus  
615 strains in this study (blue asterisks) and reference sequences isolated from humans, non-human  
616 primates, and mosquitoes. At least one representative strain from each documented ZIKV clade  
617 is included in the phylogenetic tree.

618

619 **Fig 2. Effect of IFN-I pre-treatment on diverse Zika virus strains in A549 cells.** (a) The  
620 susceptibility of each ZIKV strain to restriction by IFN $\alpha$ -2a or IFN $\beta$  was assessed in A549 cells.  
621 The titer (TCID<sub>50</sub>/mL) of each strain in the absence of IFN-I (black), presence of 1000 U/mL of  
622 IFN $\alpha$ -2a (blue), and presence of 1000 U/mL of IFN $\beta$  (purple) is shown. All data represent the  
623 average of four independent experiments that were carried out with two independently-generated  
624 stocks of each ZIKV strain. Error bars represent standard deviation. (b, c) Comparison of IFN $\alpha$ -  
625 2a-mediated (b) and IFN $\beta$ -mediated (c) restriction of African-lineage vs. Asian-lineage ZIKV  
626 strains. Percent relative infection (IFN+/IFN-) is plotted for African-lineage (light blue) and  
627 Asian-lineage (dark blue) ZIKV strains. Data points represent the average of four independent  
628 experiments that were carried out with two independently-generated stocks of each ZIKV strain.  
629 Error bars indicate the SEM. A two-tailed student's t-test was used to compare percent relative  
630 infection of African-lineage vs. Asian-lineage ZIKV strains.

631

632 **Fig 3. Expression of IFITM3 in A549 cells transduced with exogenous IFITM3 compared to**  
633 **after IFN-I-induction.** (a) Western blot analysis of IFITM3 expression in A549 cells pretreated  
634 with increasing concentrations of IFN $\beta$  for 24 hours. The concentration of IFN is indicated above  
635 each lane. (b) Western blot analysis of IFITM3-FLAG expression using an anti-FLAG antibody

636 in IFITM3 A549 cell lines. (c) Western blot analyses of expression of IFITM3-FLAG protein  
637 compared to endogenous IFITM3 using an anti-IFITM3 antibody.

638

639 **Fig 4. Infection of cells expressing IFITM3-FLAG in the absence and presence of IFN $\beta$ .** (a,

640 b) Infection with (a) MR 766 and (b) PRVABC59. Both panels show viral titers 48 hpi in

641 untreated IFITM3 cells (blue) or pre-treated with 1000 U/mL of IFN $\beta$  (purple). For each strain,

642 percent relative infection (IFITM3/Control or IFN+/Control) is shown. All data represent the

643 average of four independent experiments that were carried out with two independently-generated

644 stocks of each ZIKV strain. Error bars indicate standard deviation. (c, d) Infection of IFITM3

645 cells with mCherry-expressing (c) Influenza A/WSN reporter virus and (d) VLPs expressing

646 murine leukemia virus envelope protein. \* $p < 0.05$ , \*\* $p < 0.01$  (one-way analysis of variance

647 (ANOVA) followed by Dunnett's post-hoc test for multiple comparisons).

648

649 **Fig 5. Analysis and infection results of IFITM 3 knock-out cells.** (a) Western blot analysis of

650 IFITM3 expression in untreated or IFN $\beta$  pretreated (1000 U/mL) A549 cells transduced with

651 non-targeting control (NTC), sgRNA1 (sg1), or sgRNA2 (sg2). The sgRNA used to transduce

652 each cell line is indicated above each lane. (b) Infection results with MR 766 and PRVABC59

653 showing viral titers 48 hpi in IFITM3-knockout and control A549 cells. The percent relative

654 infection (normalized to NTC Untreated) of each strain in the absence of IFN-I (black) and

655 presence of 1000 U/mL of IFN $\beta$  (purple) is shown in each indicated cell type. All data represent

656 the average of four independent experiments that were carried out with two independently-

657 generated stocks of each ZIKV strain. Error bars indicate standard deviation. \*\*\* $p < 0.001$  (two-



658 way analysis of variance (ANOVA) followed by Dunnet's post-hoc test for multiple  
659 comparisons).

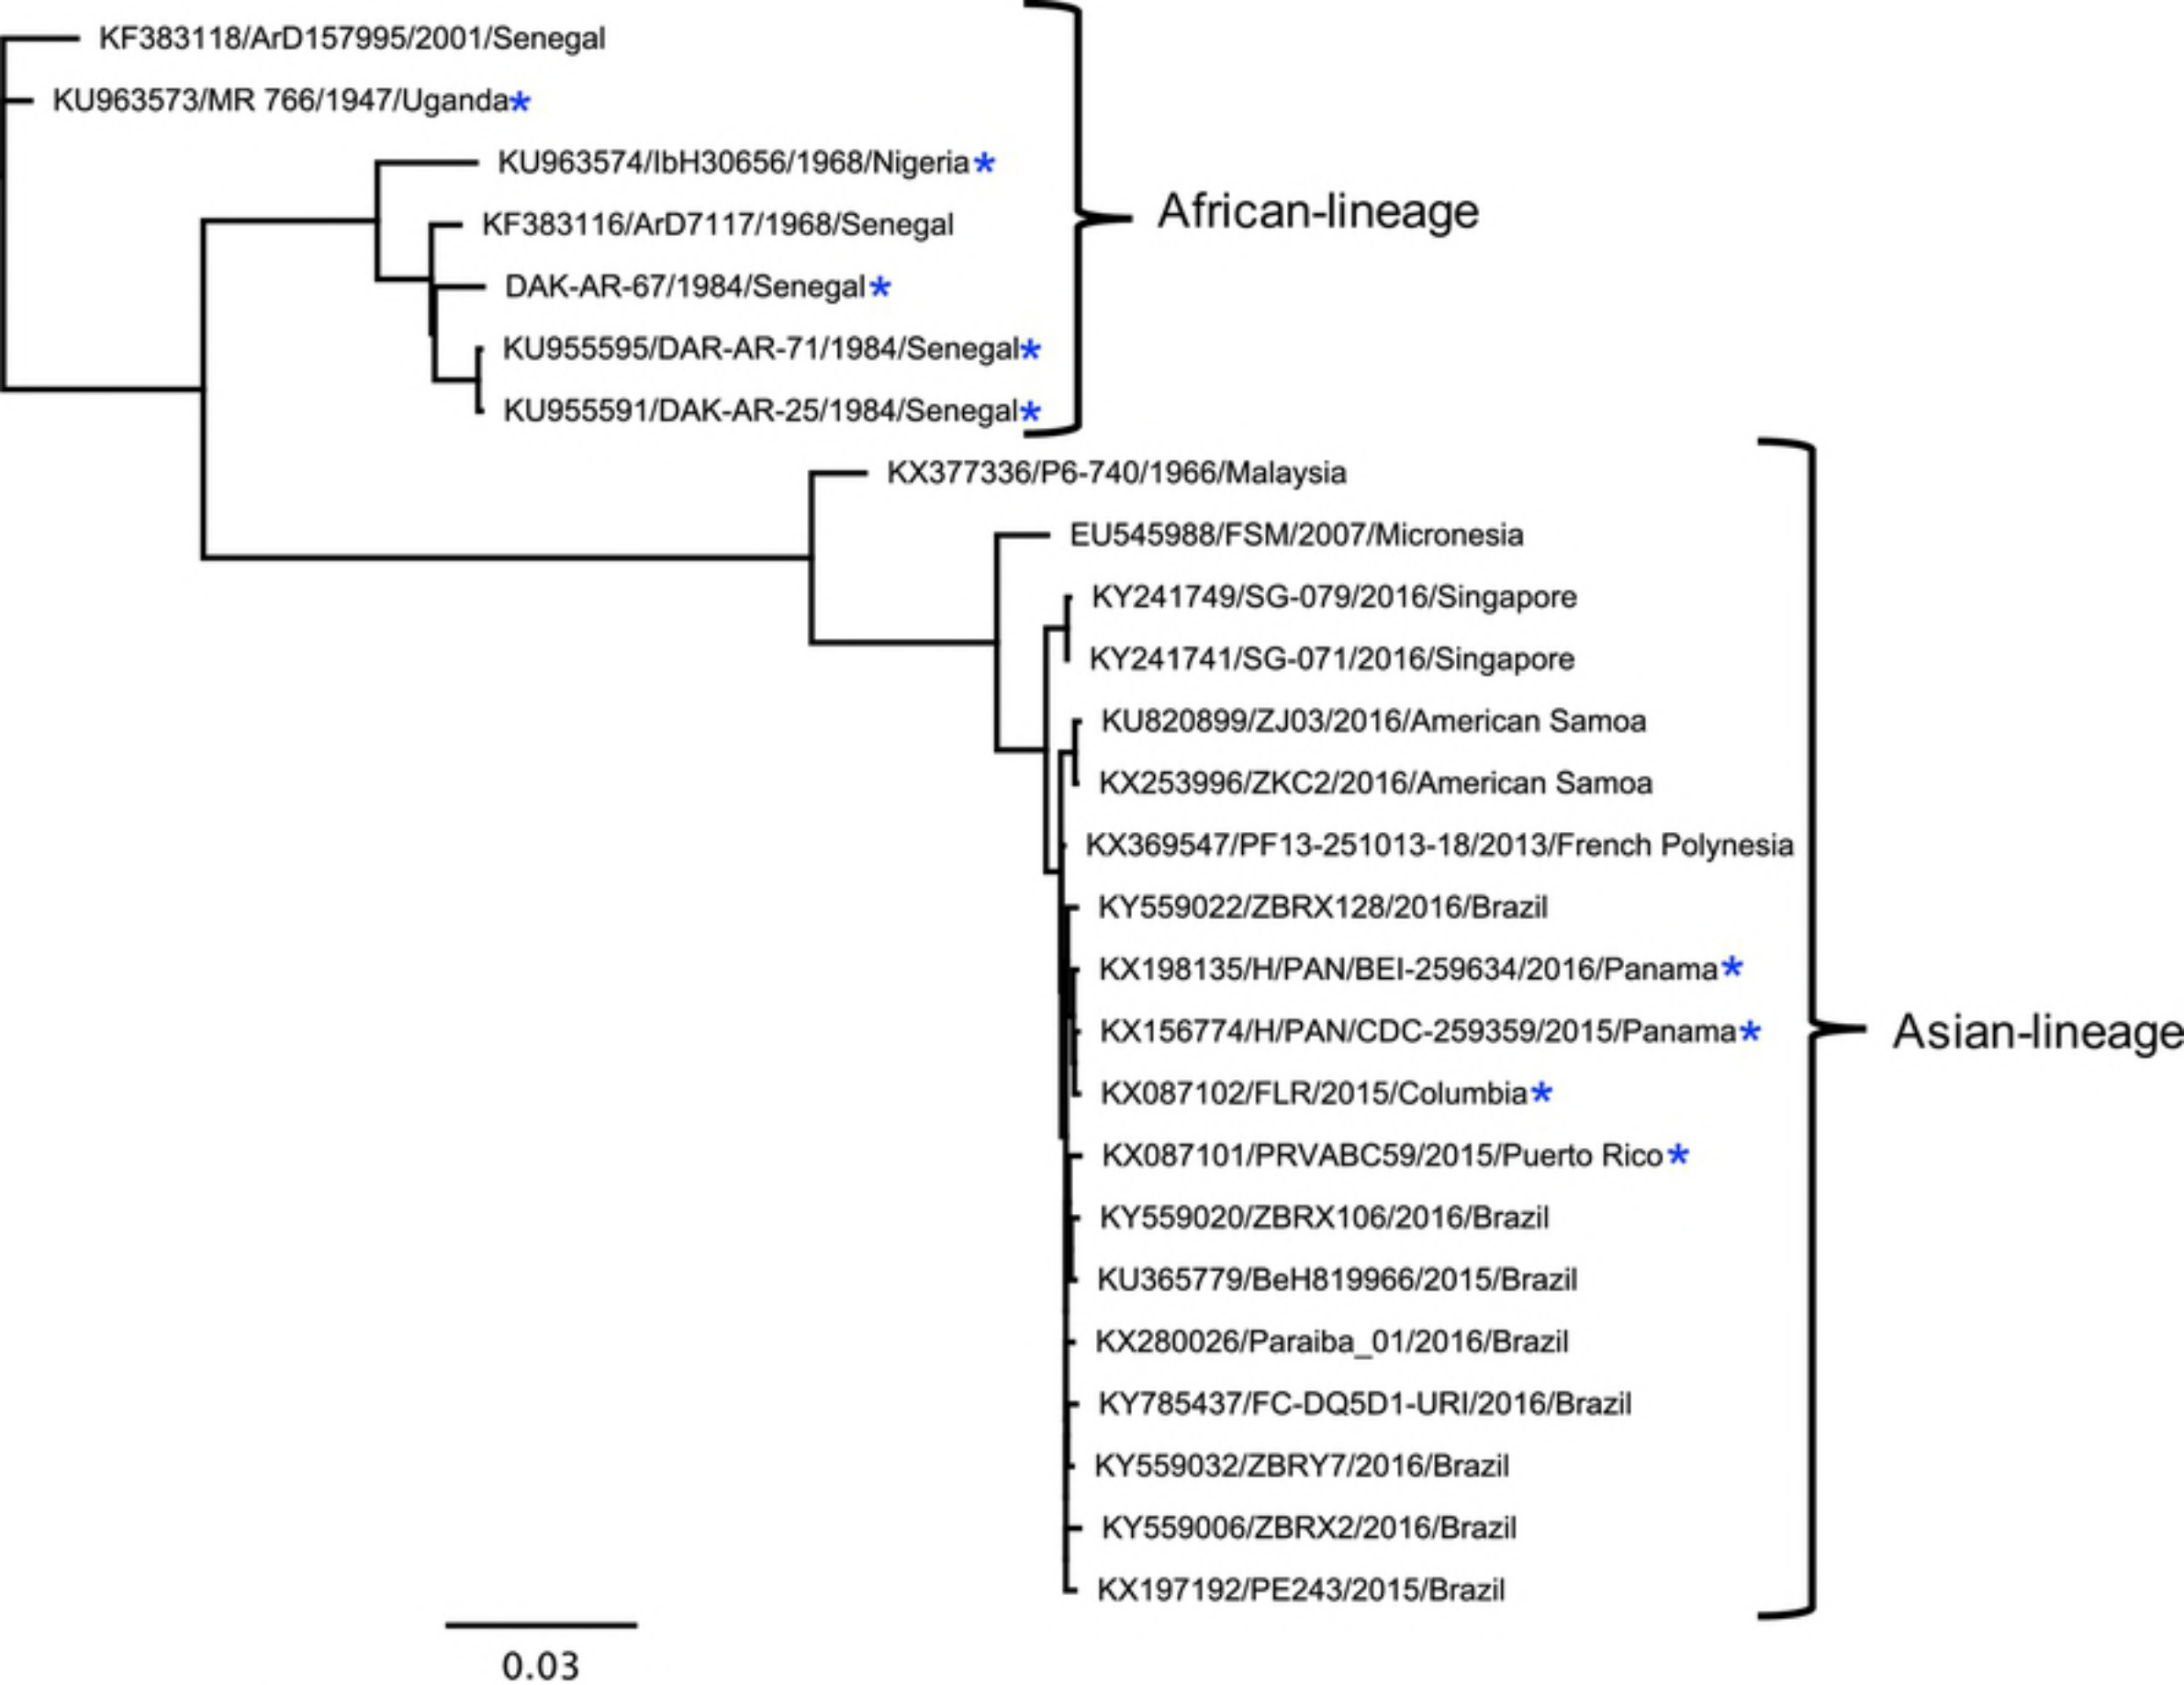

Figure 1

**a**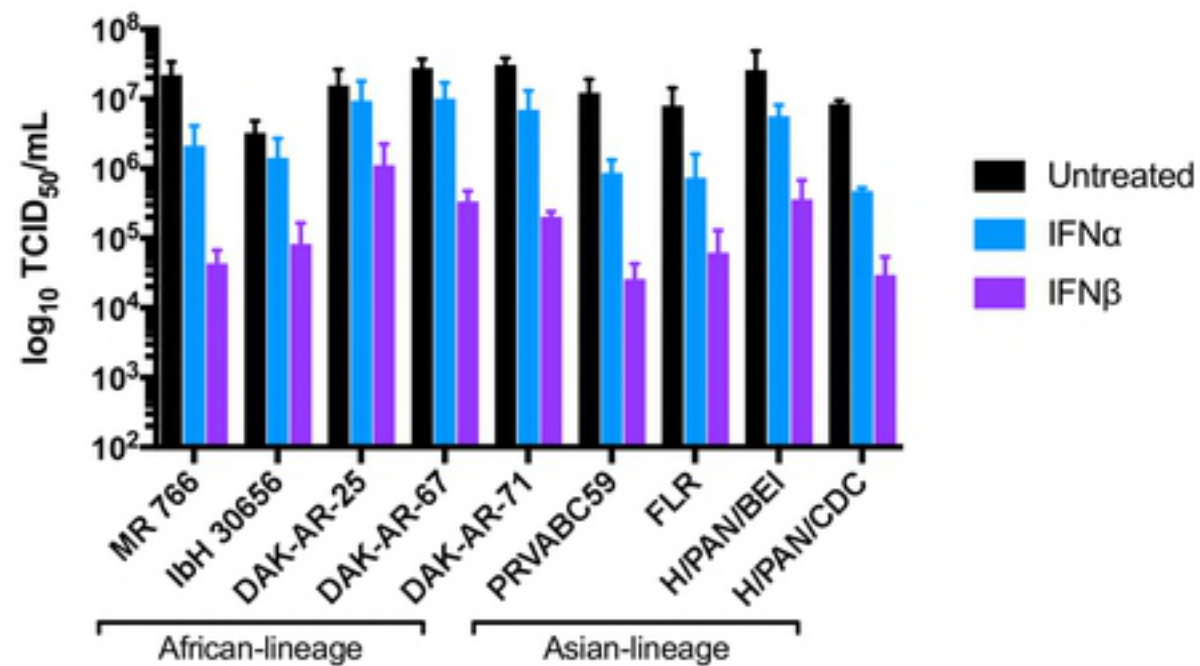**b**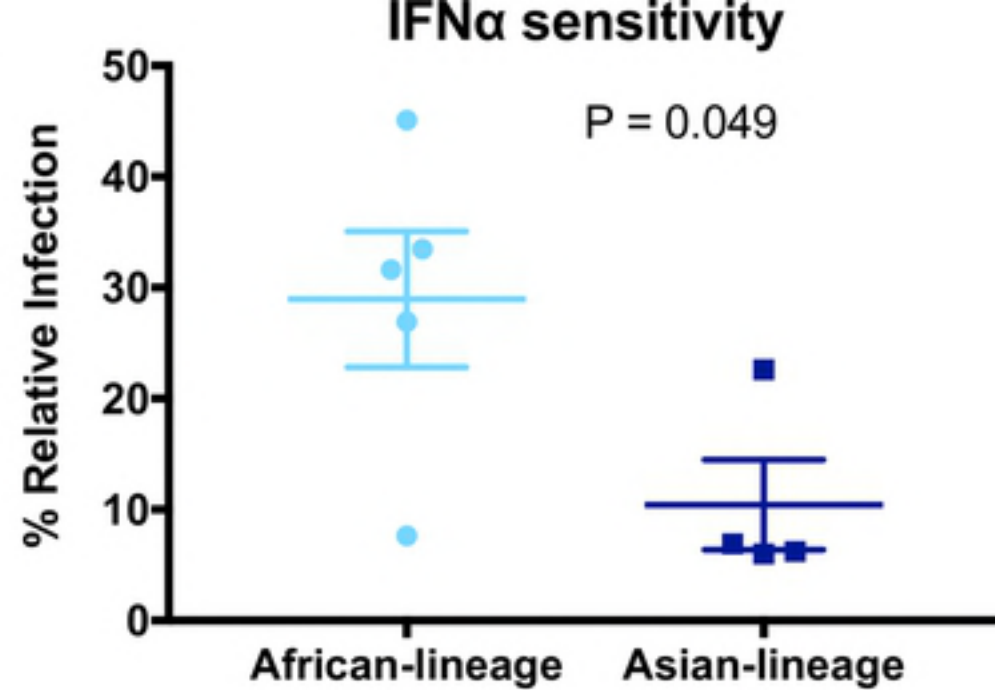**c**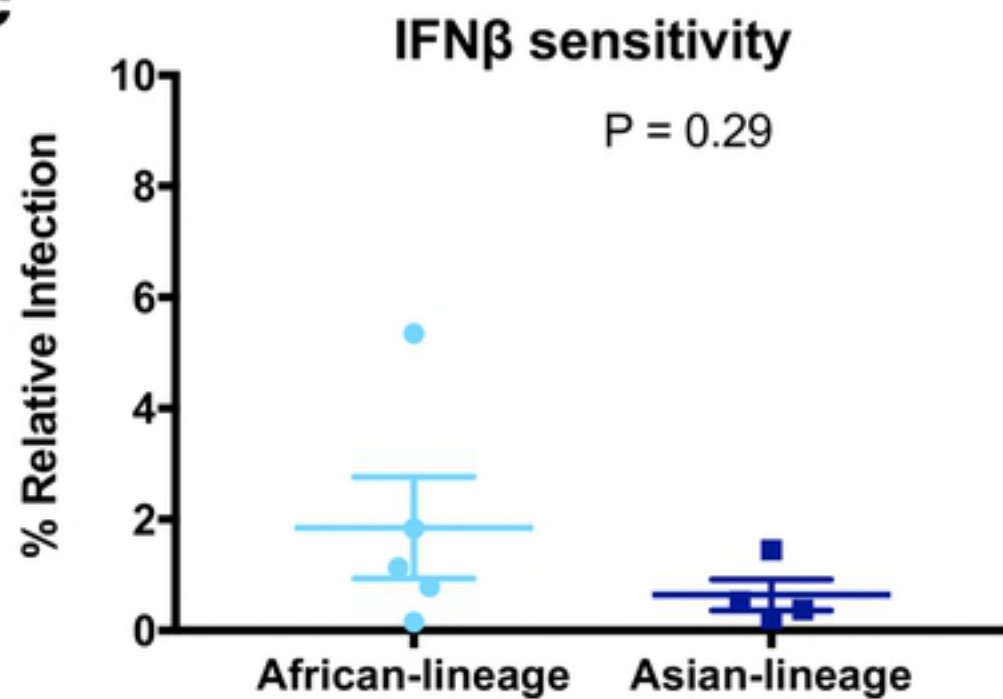

Figure 2

**a**

IFN $\beta$  IFN- $\alpha$

U/ml: 0 1000 200 40 8 1.6 0.3 1000

bioRxiv preprint doi: <https://doi.org/10.1101/455972>; this version posted October 29, 2018. The copyright holder for this preprint (which was not certified by peer review) is the author/funder, who has granted bioRxiv a license to display the preprint in perpetuity. It is made available under aCC-BY 4.0 International license.

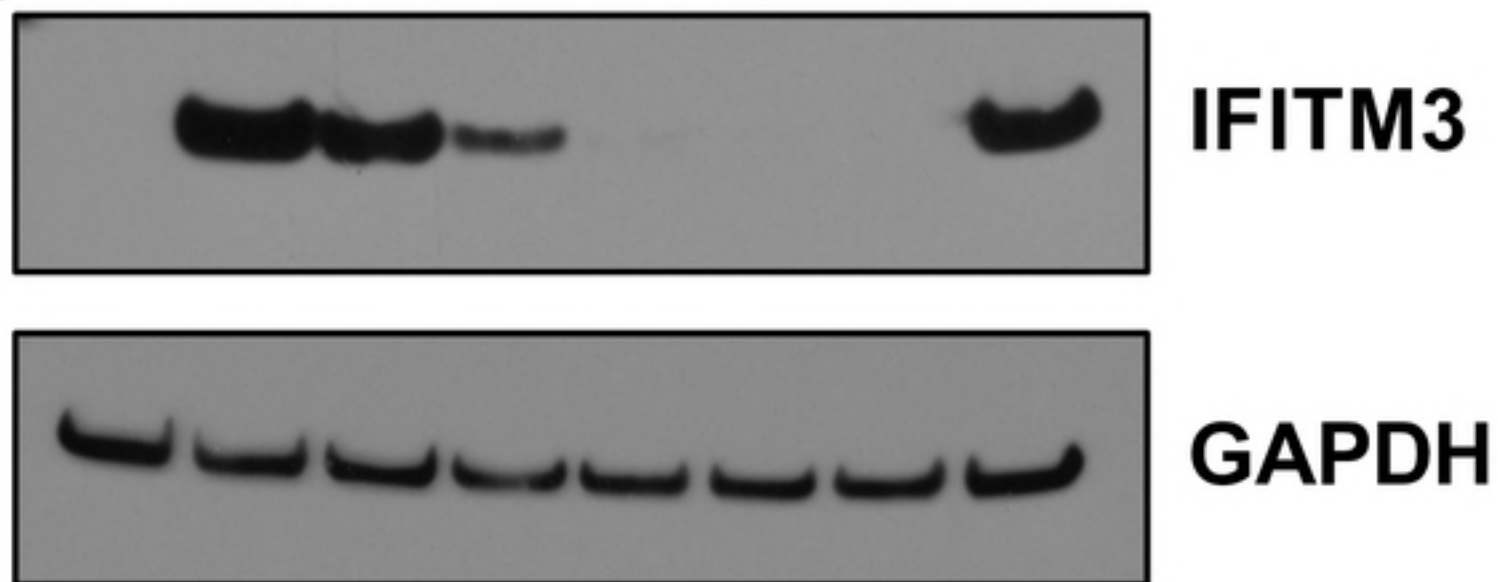**b**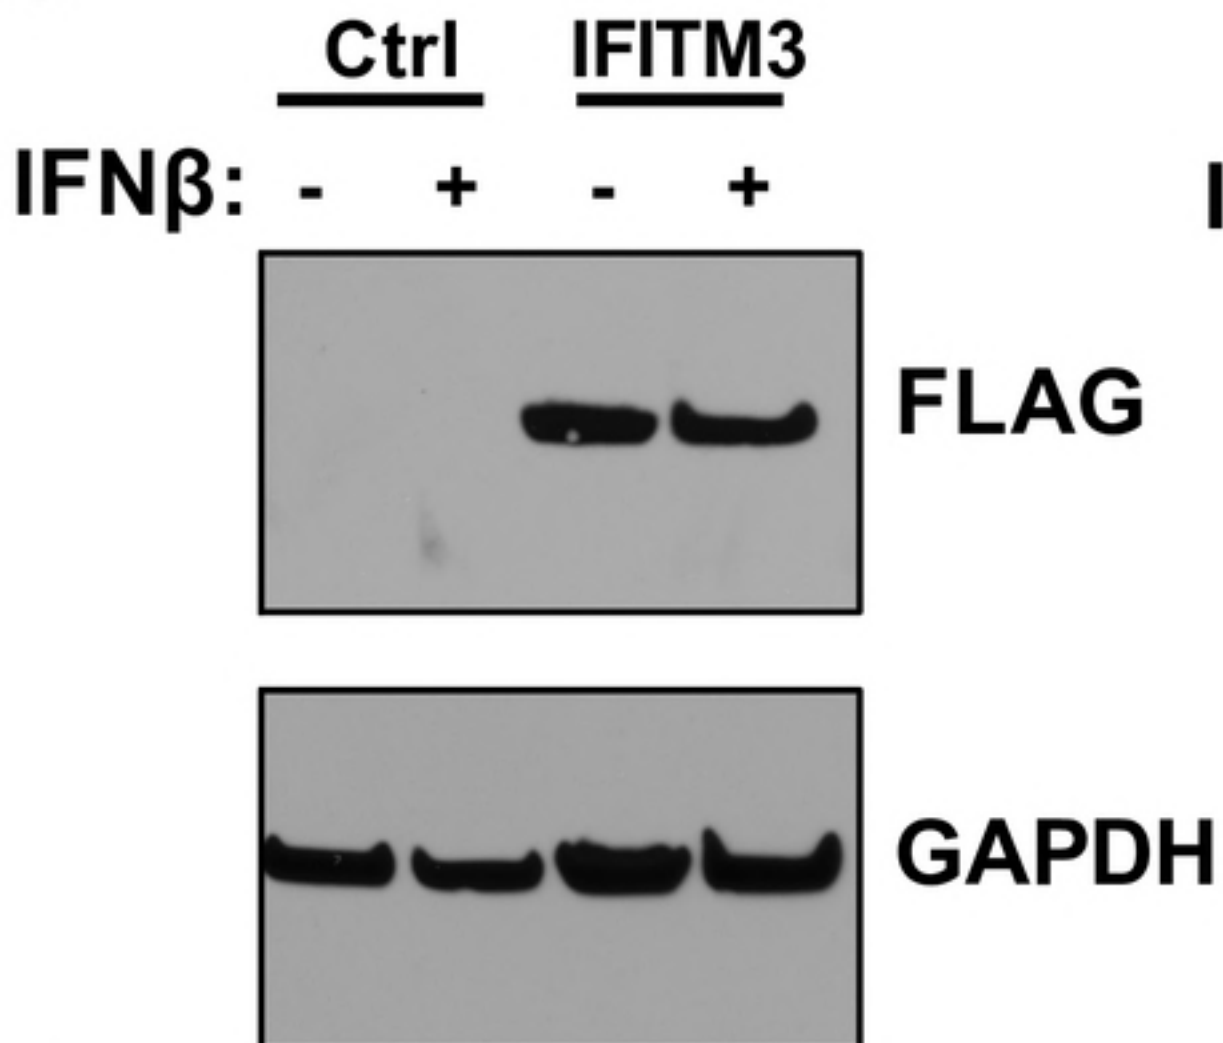**c**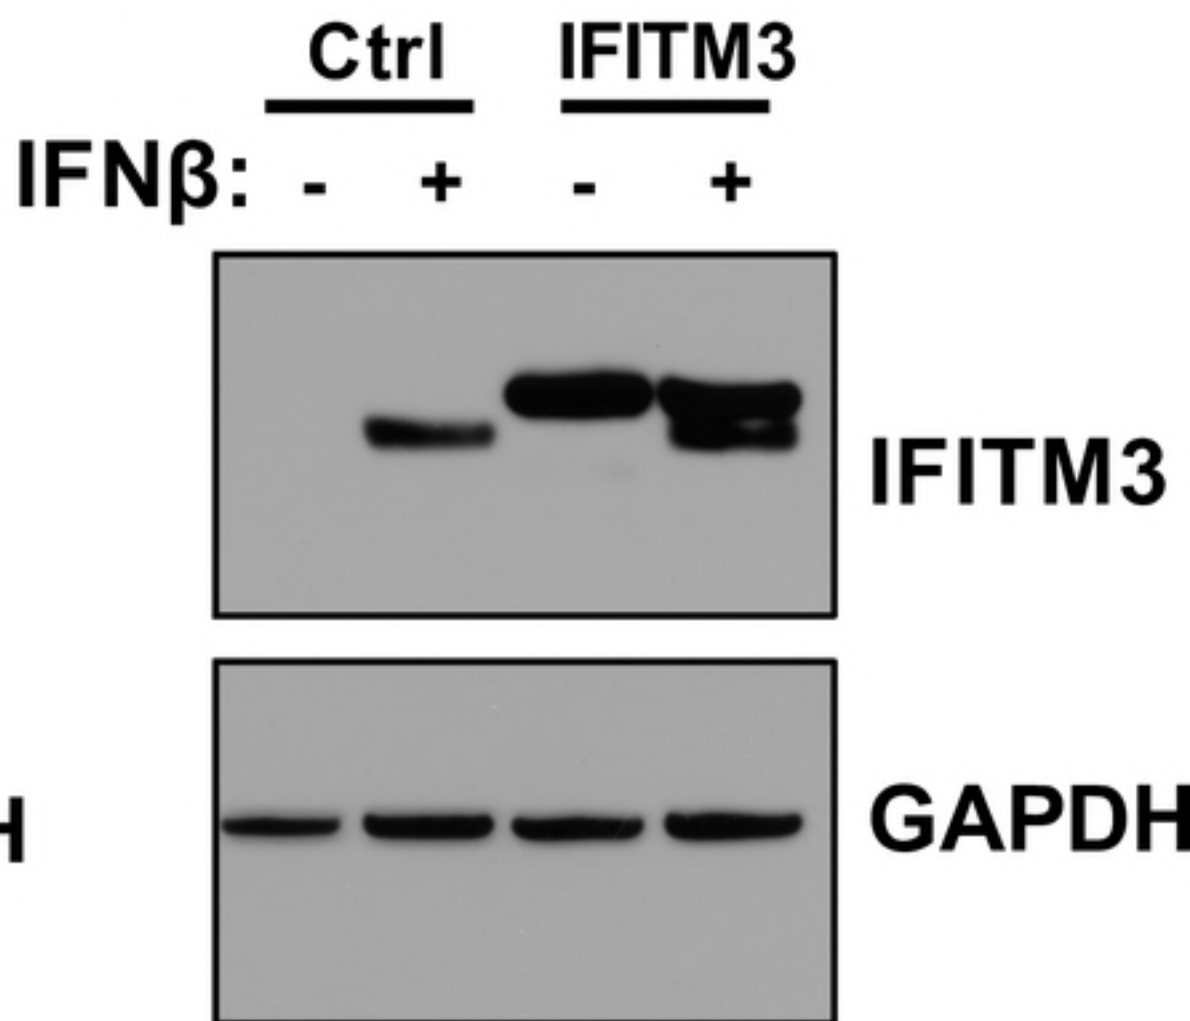

Figure 3

**a**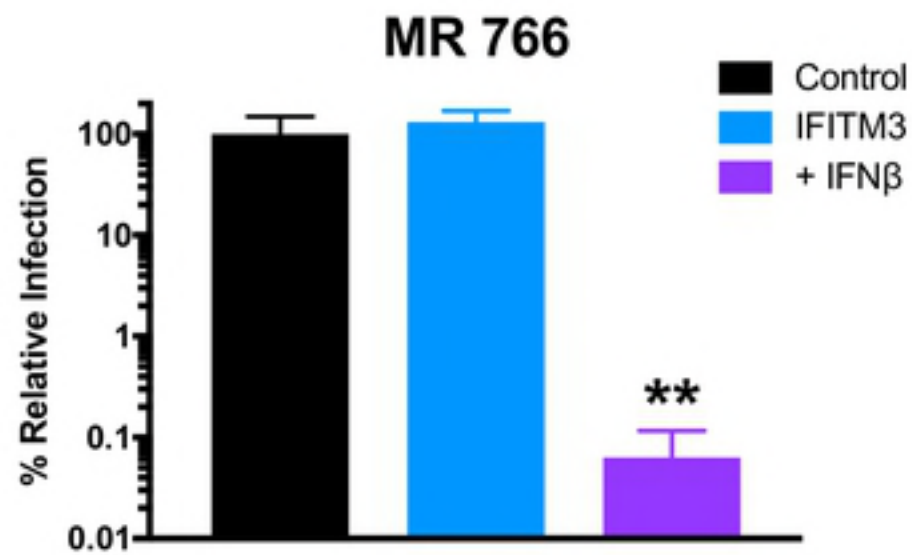**b**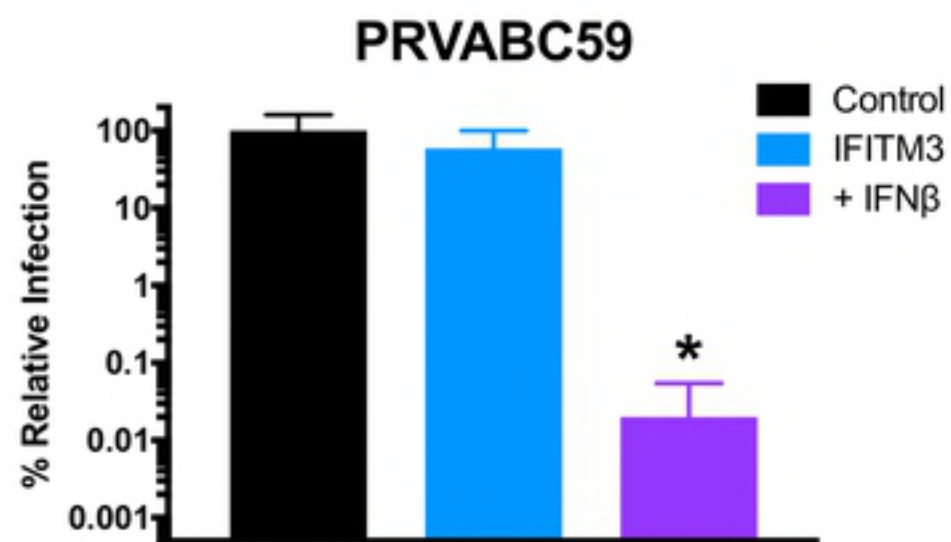**c**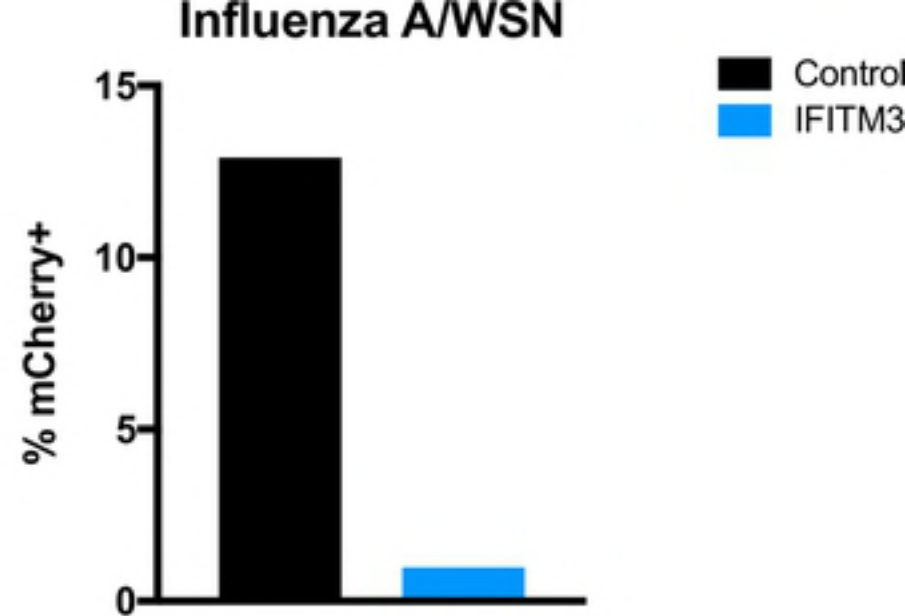**d**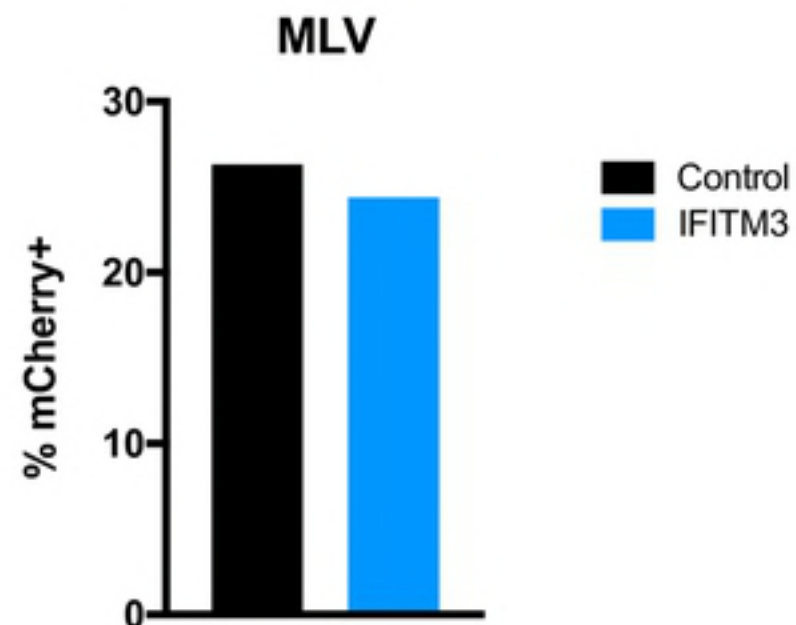

Figure 4

**a**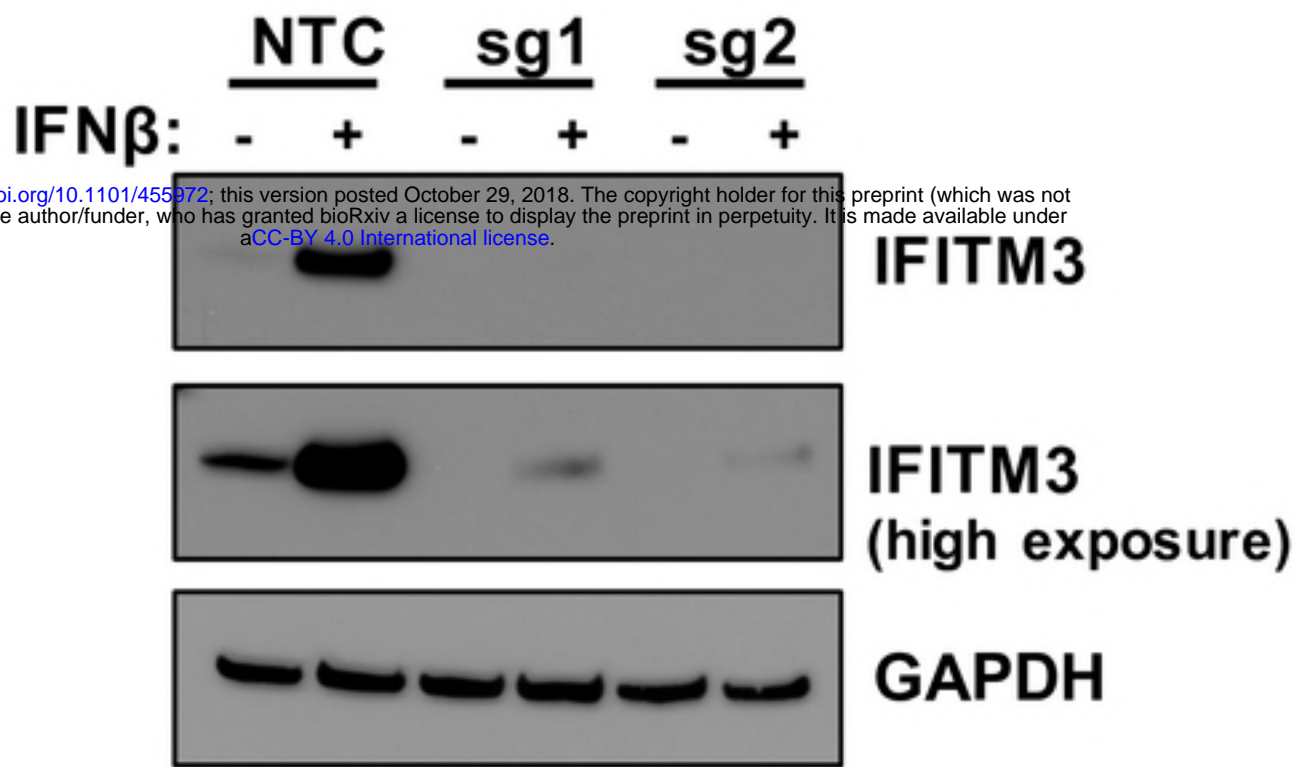

bioRxiv preprint doi: <https://doi.org/10.1101/455972>; this version posted October 29, 2018. The copyright holder for this preprint (which was not certified by peer review) is the author/funder, who has granted bioRxiv a license to display the preprint in perpetuity. It is made available under aCC-BY 4.0 International license.

**b**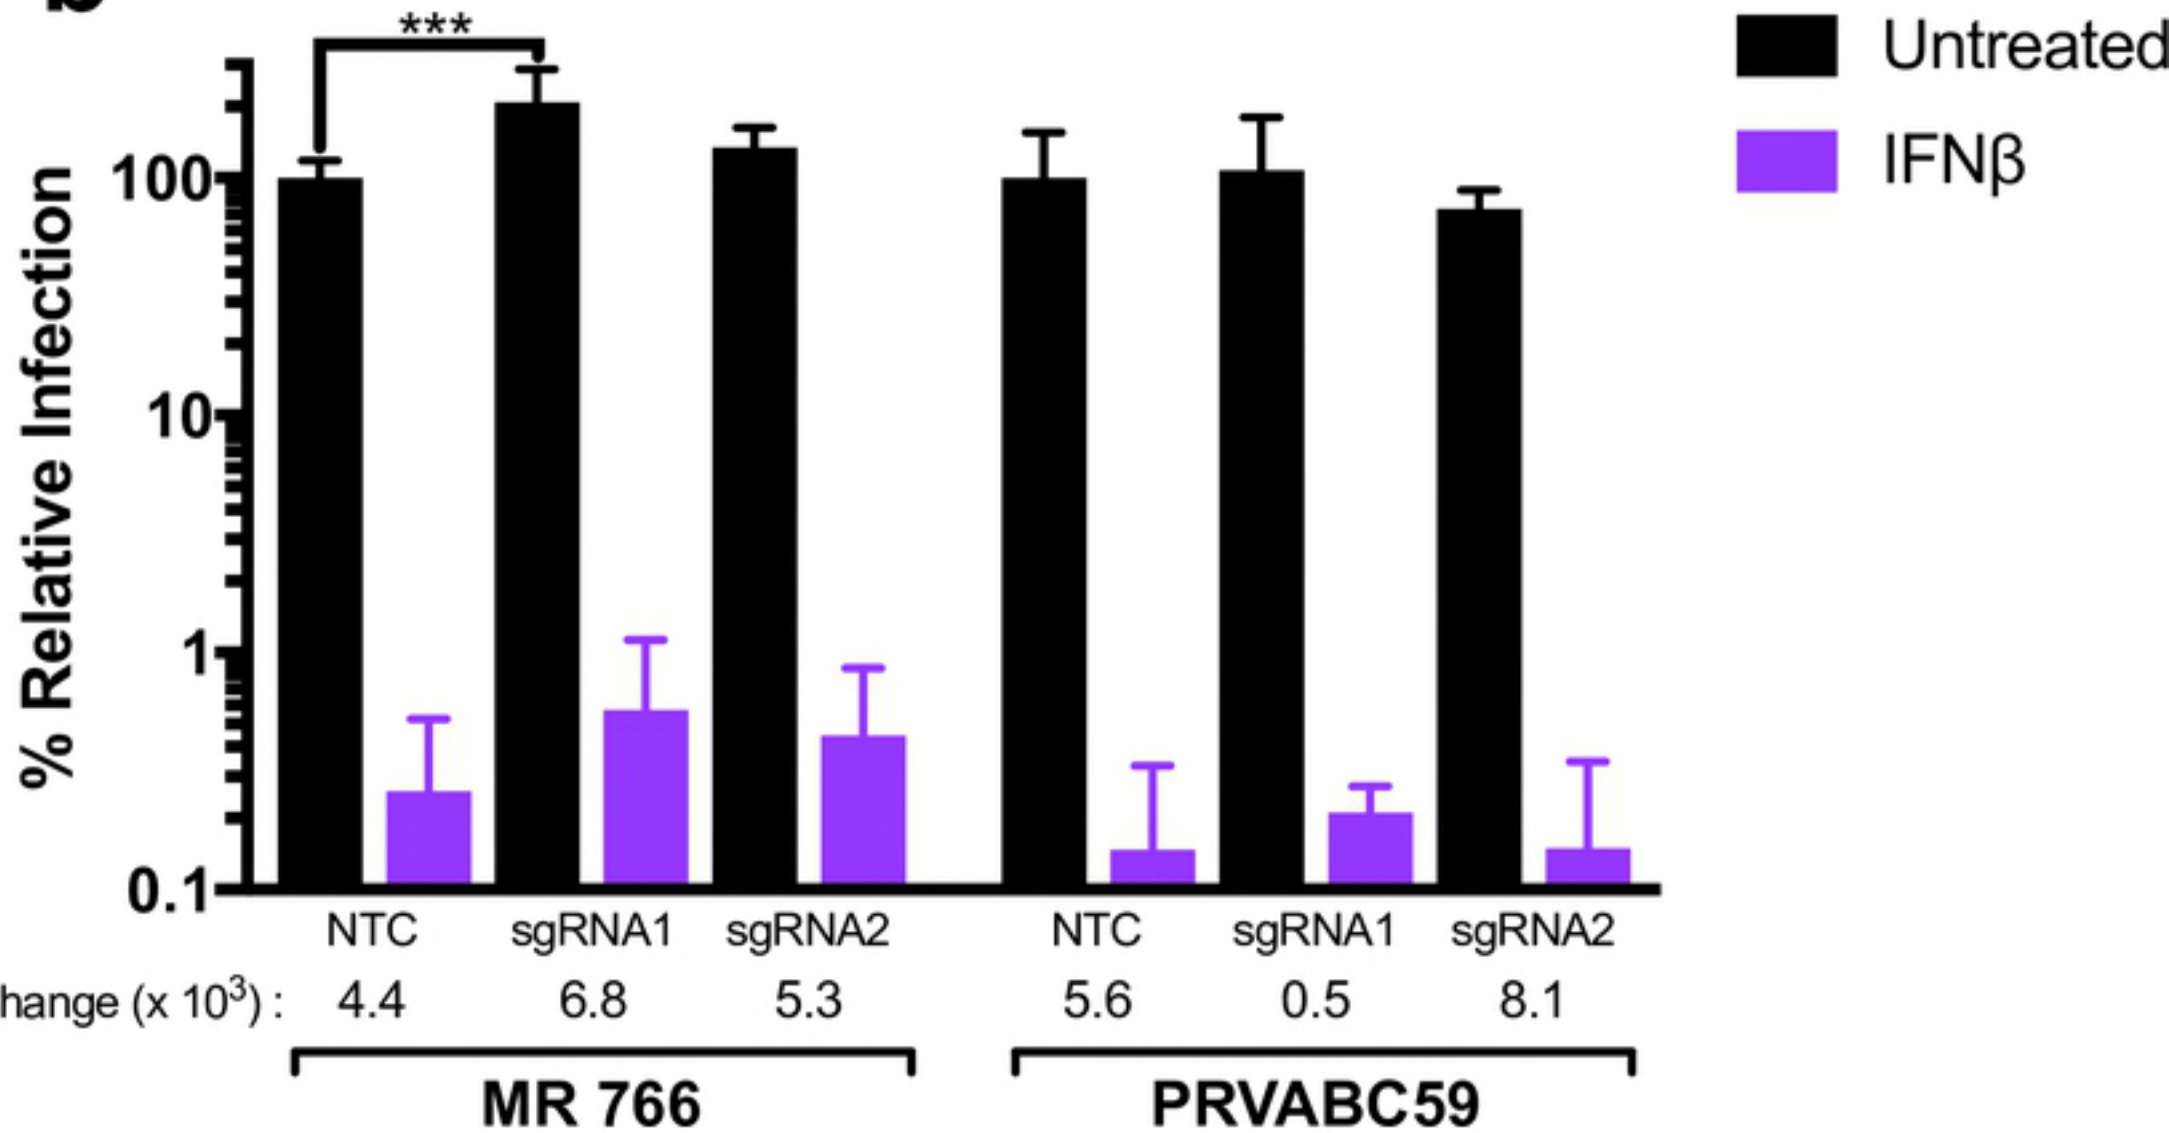

Figure 5
